# Supplementary material for: Palladium-catalyzed allylation of aminophenol with alkynes to construct C–N bonds
Source: Royal Society of Chemistry journal article supplement (doi:10.1039/c9ob00333a), 2019-01-01

## **Supporting Information for:**

### **Palladium-Catalyzed Allylation of Aminophenols with Alkynes to Construct C-N bonds**

Chuan-jun Lu,\* Xin Yu, Dong-Kai Chen, Hong Wang,\* Qing-Bao Song, Jian-Rong Gao

*College of Chemical Engineering, Zhejiang University of Technology, Chaowang Road 18<sup>#</sup>, Hangzhou 310014, China.*

Copies of  $^1\text{H}$  and  $^{13}\text{C}$  NMR Spectra of the Products.....2-29

# <sup>1</sup>H and <sup>13</sup>C NMR spectra

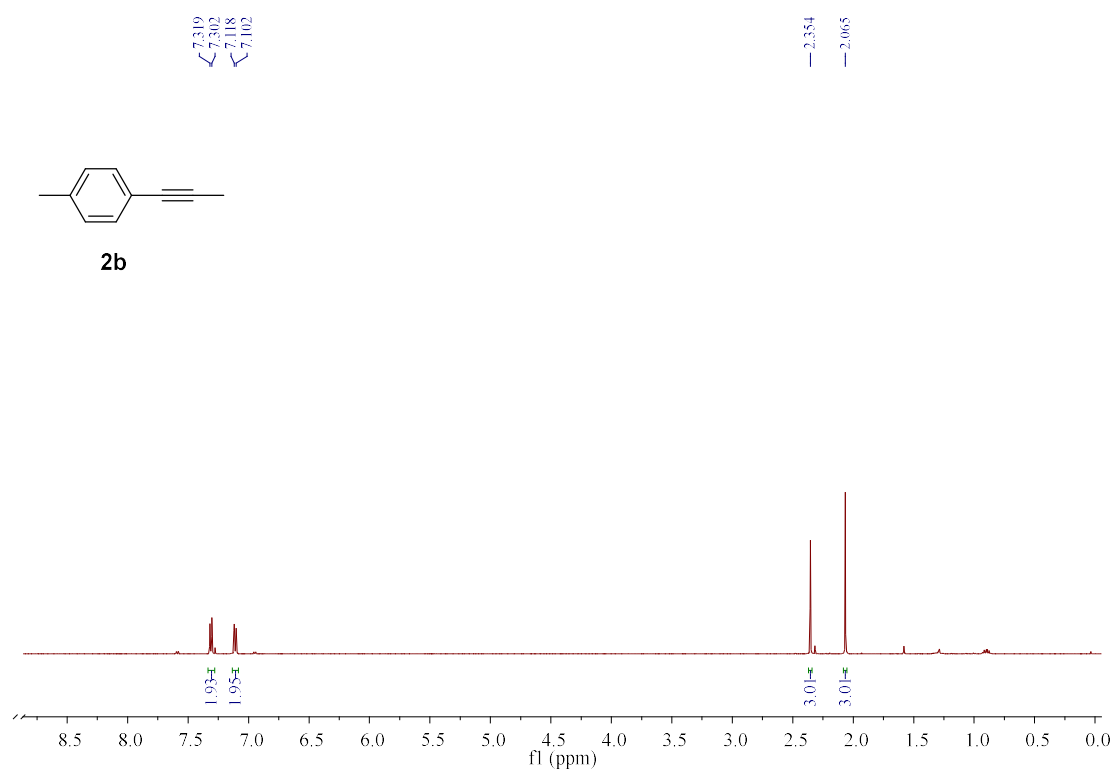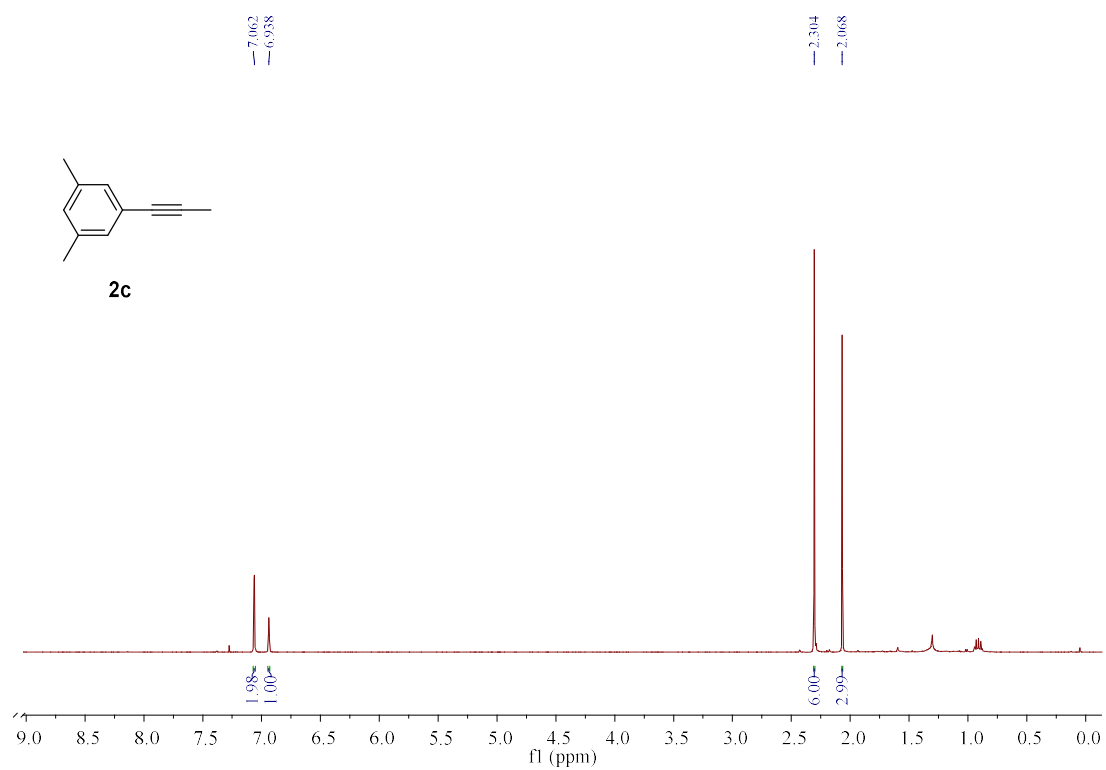

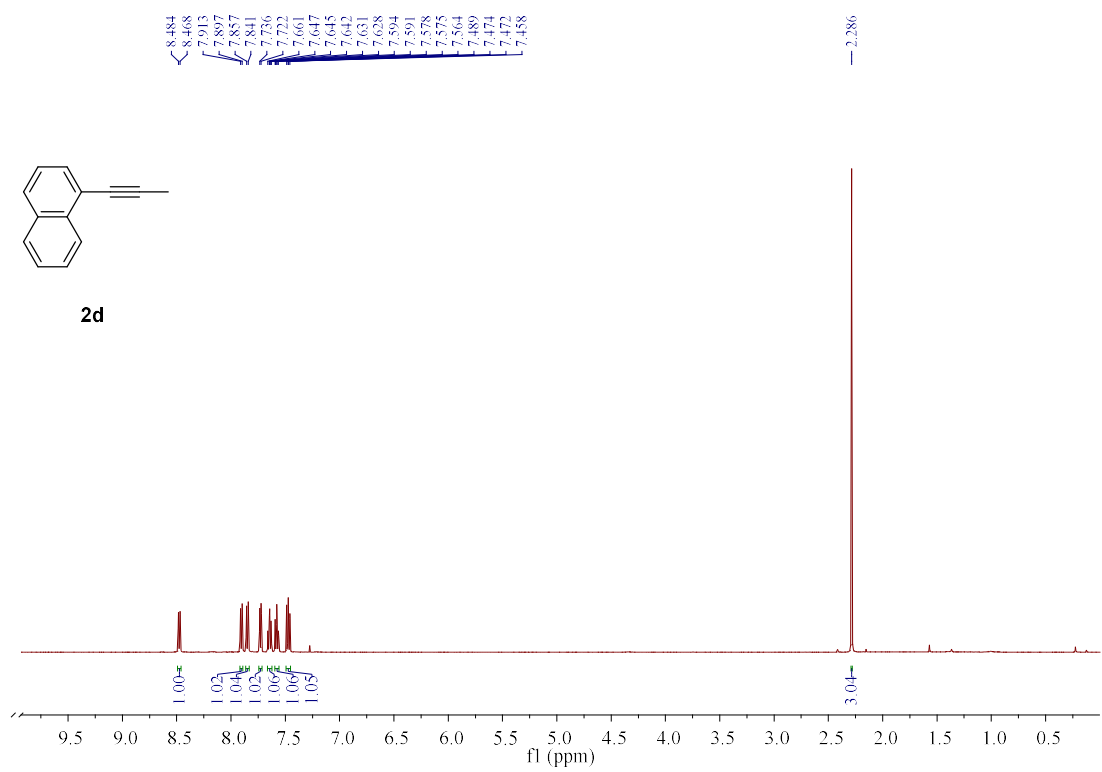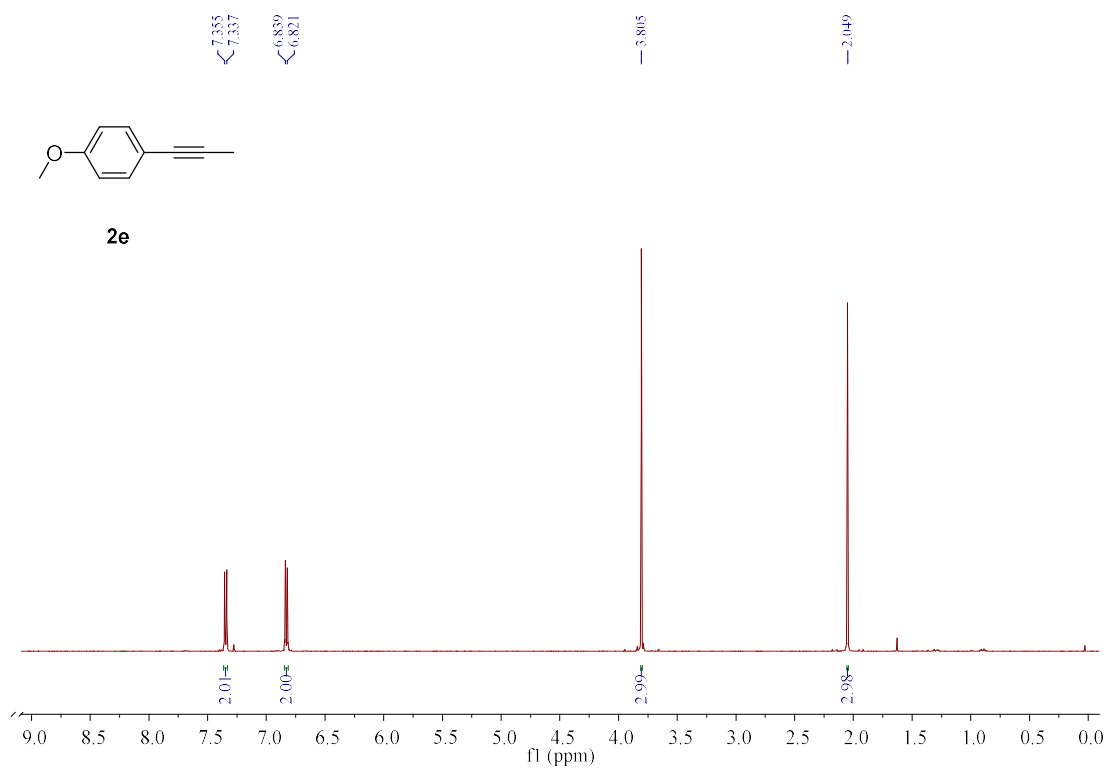

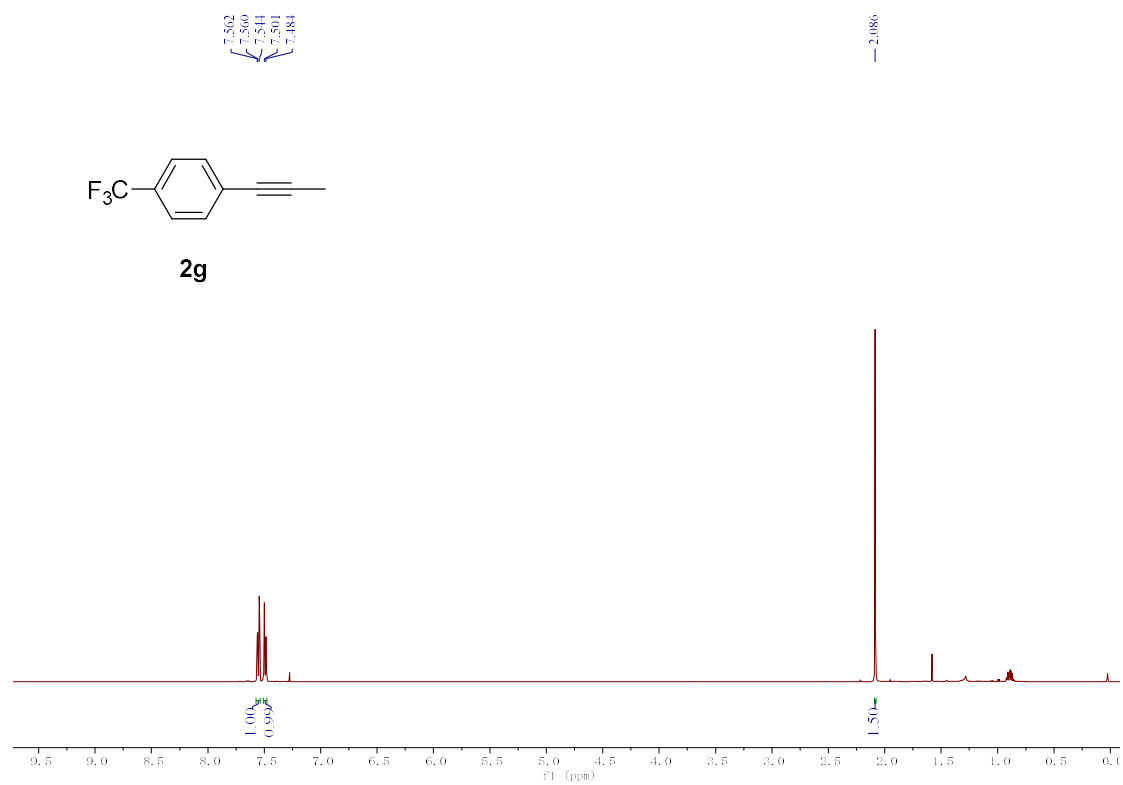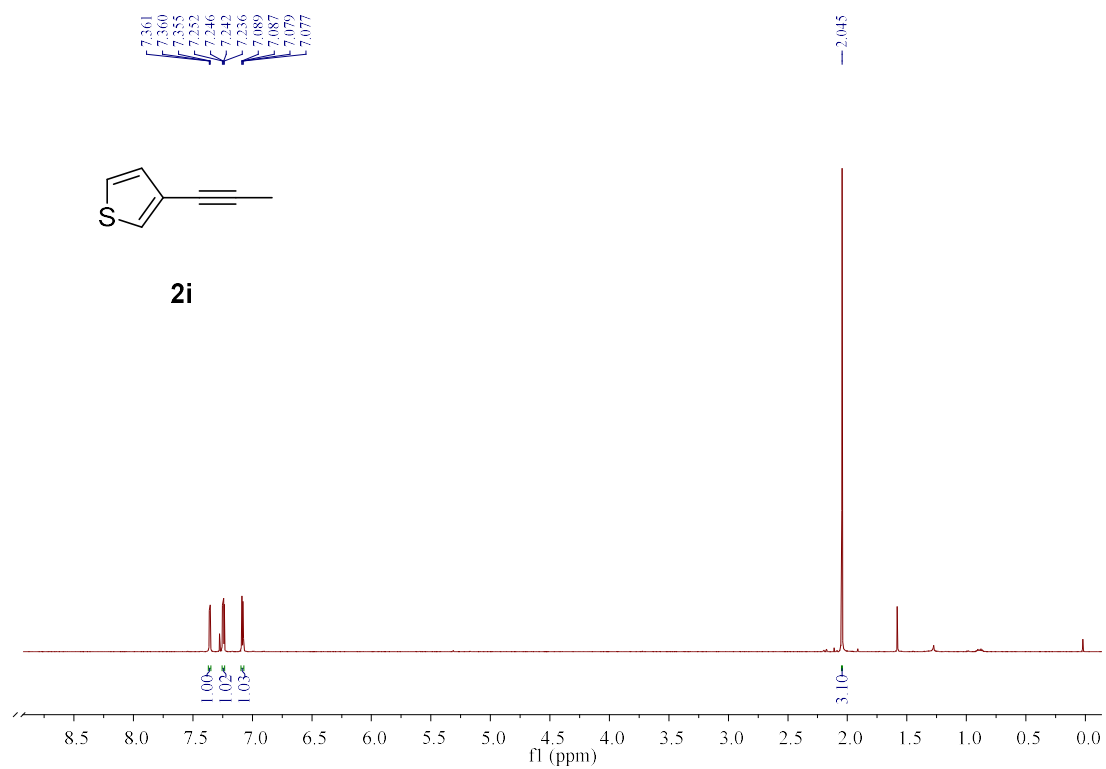

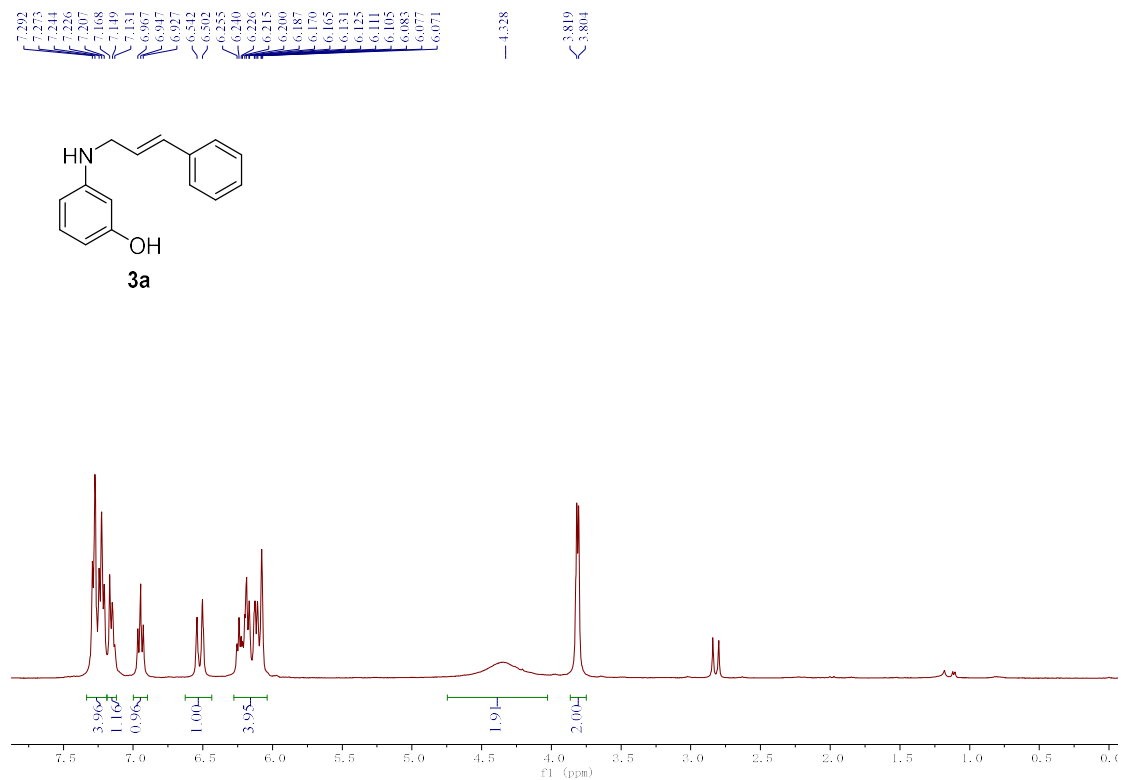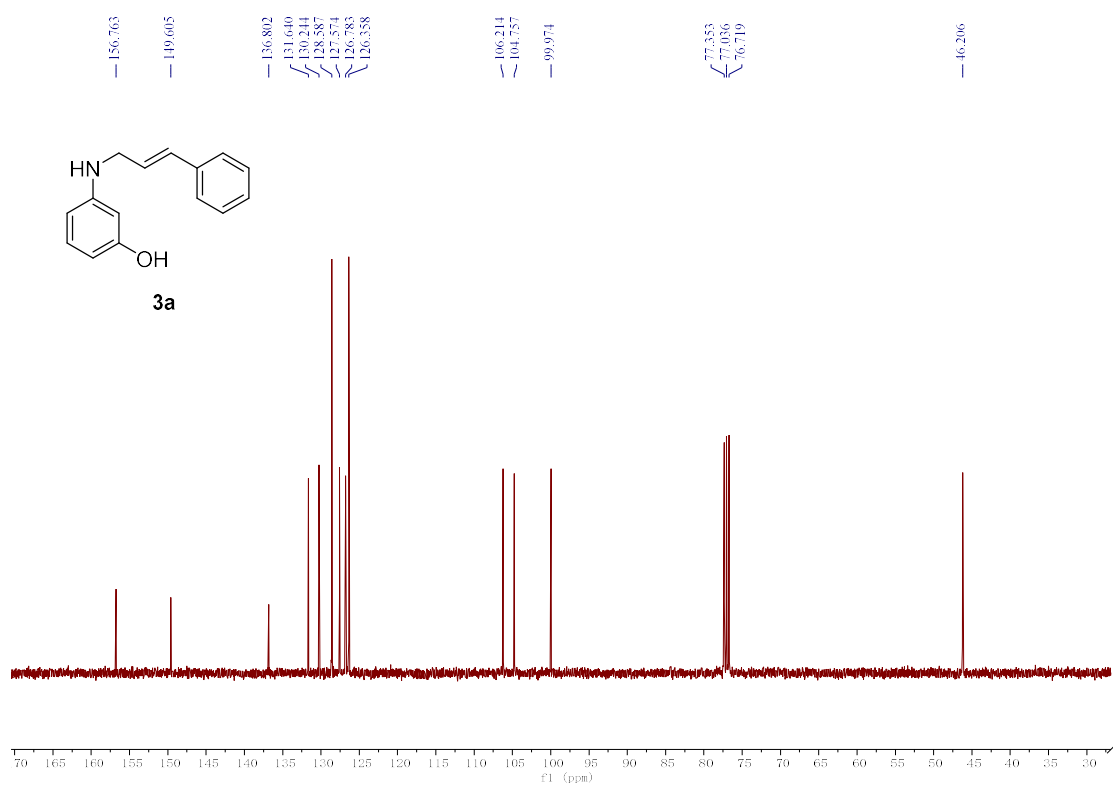



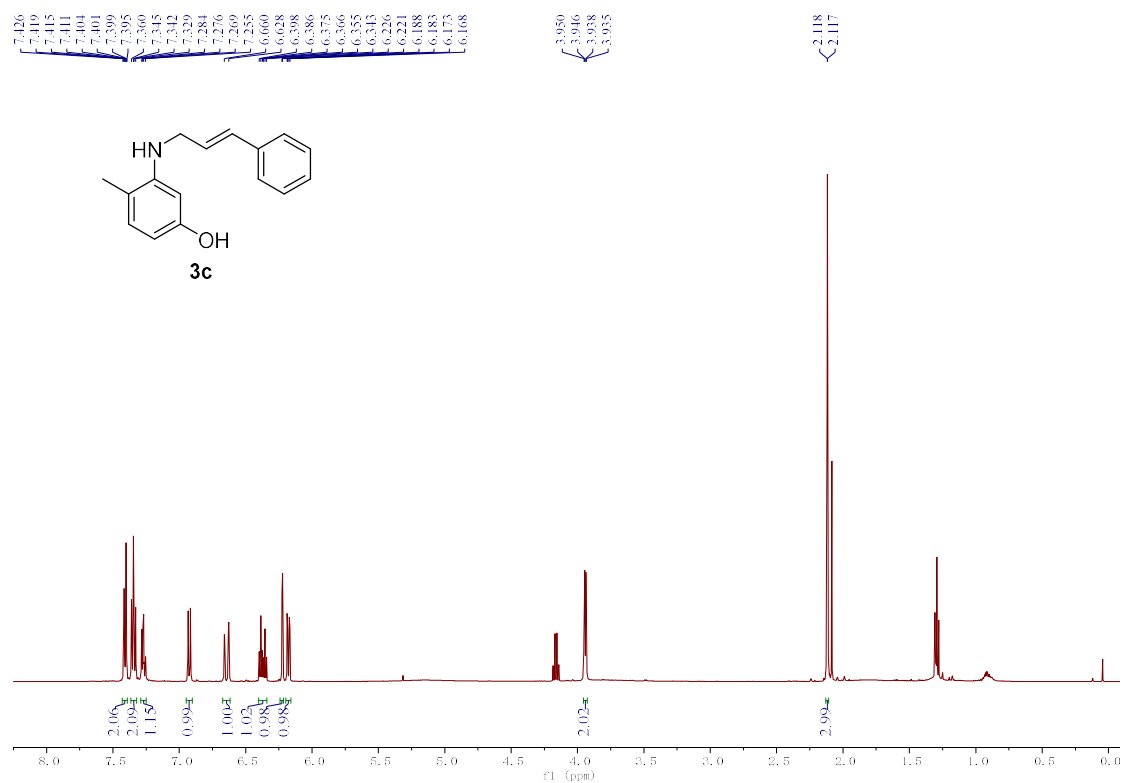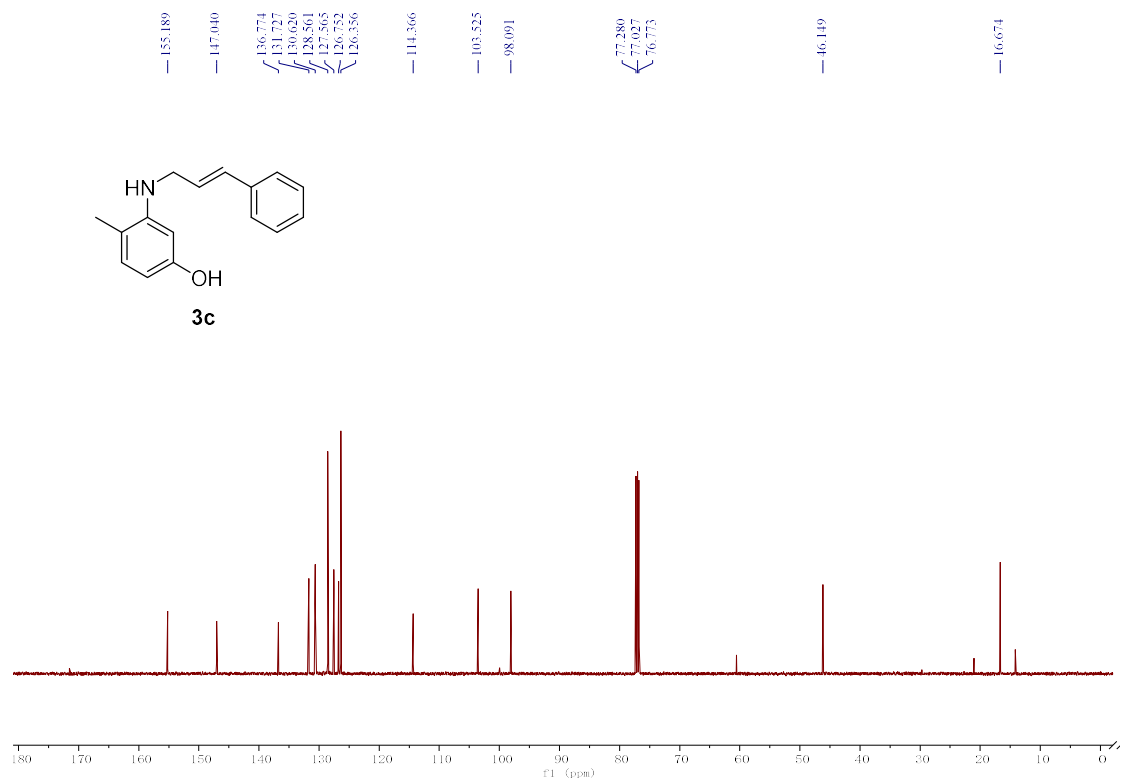

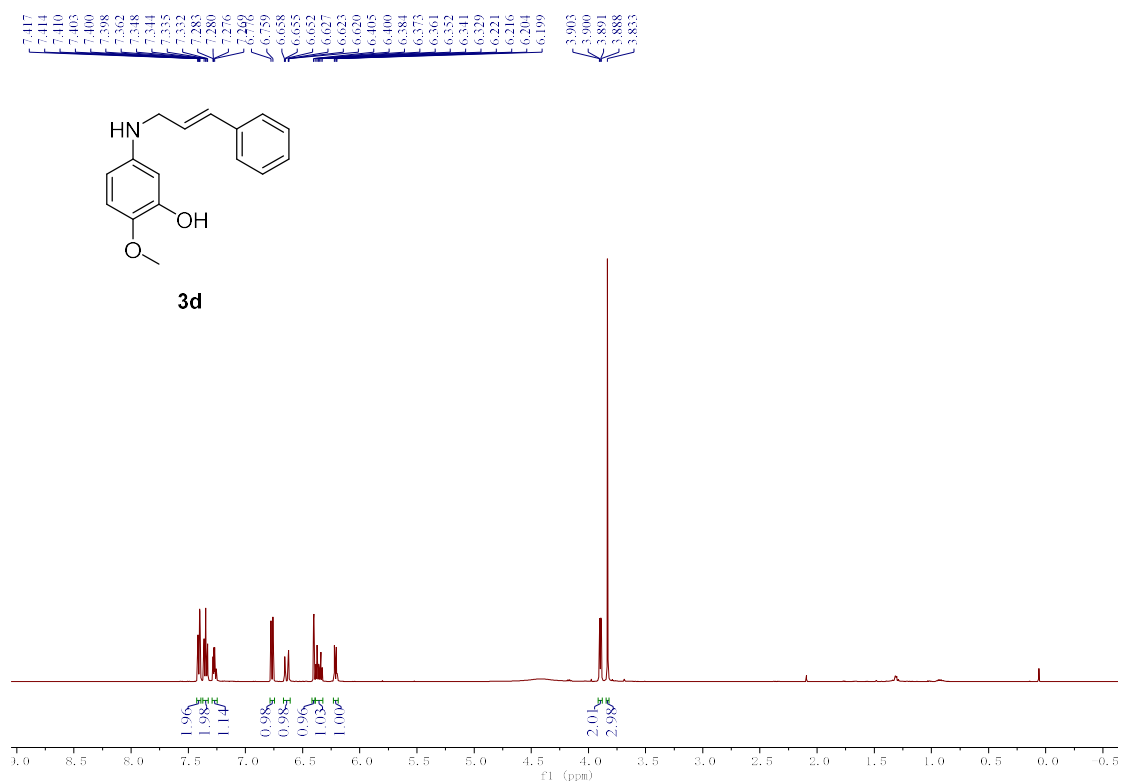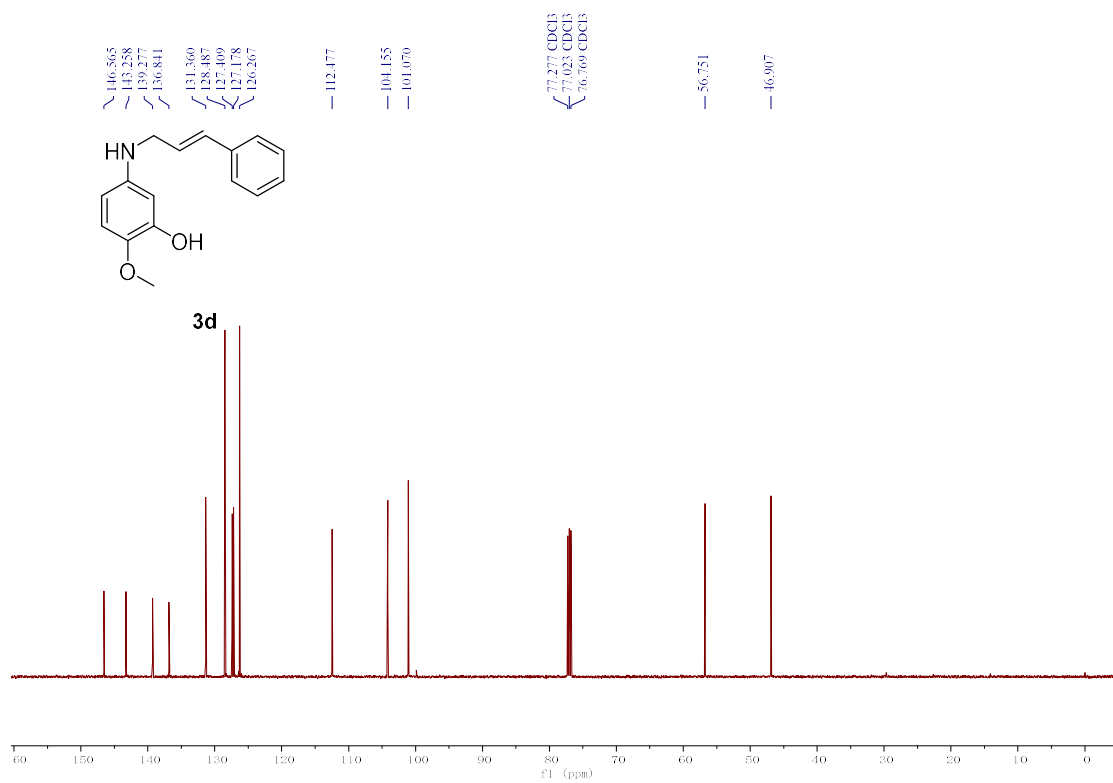



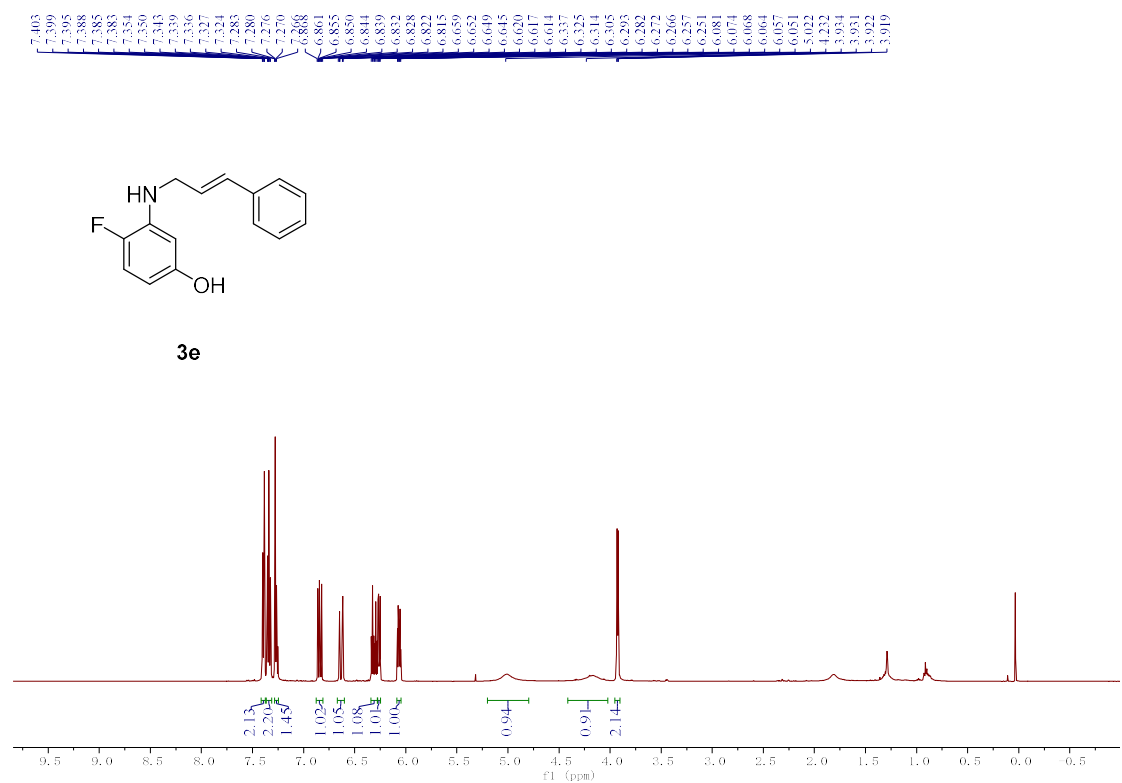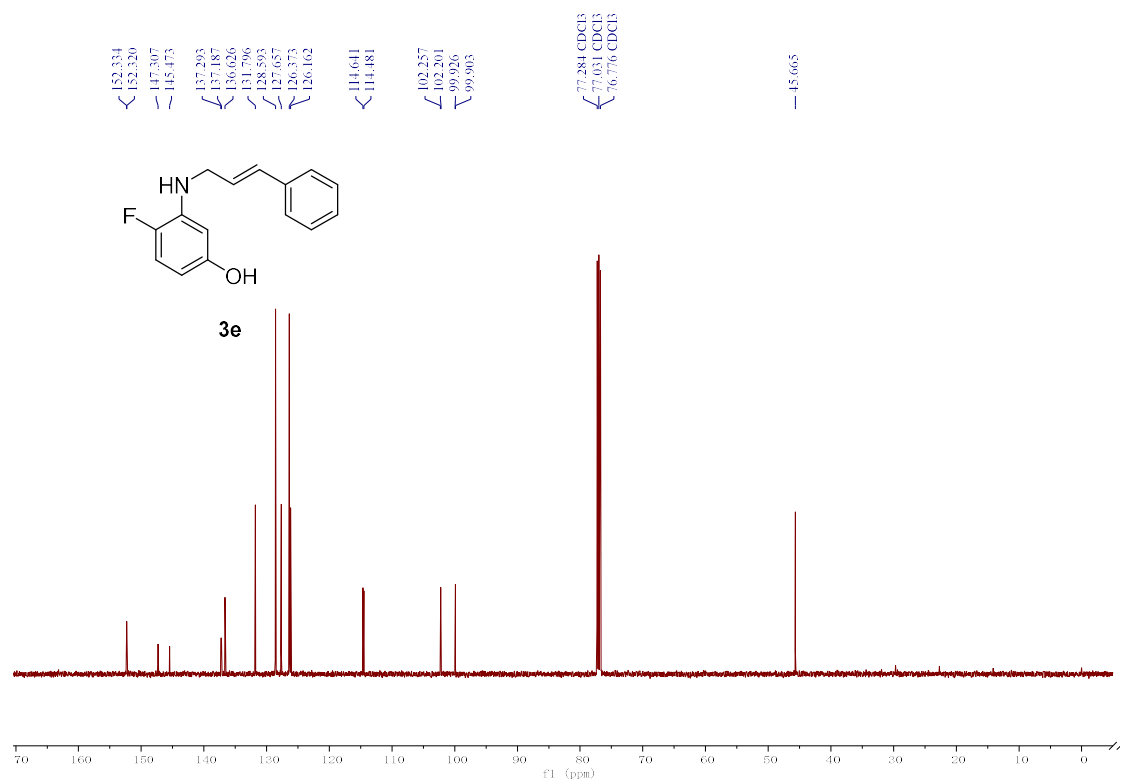

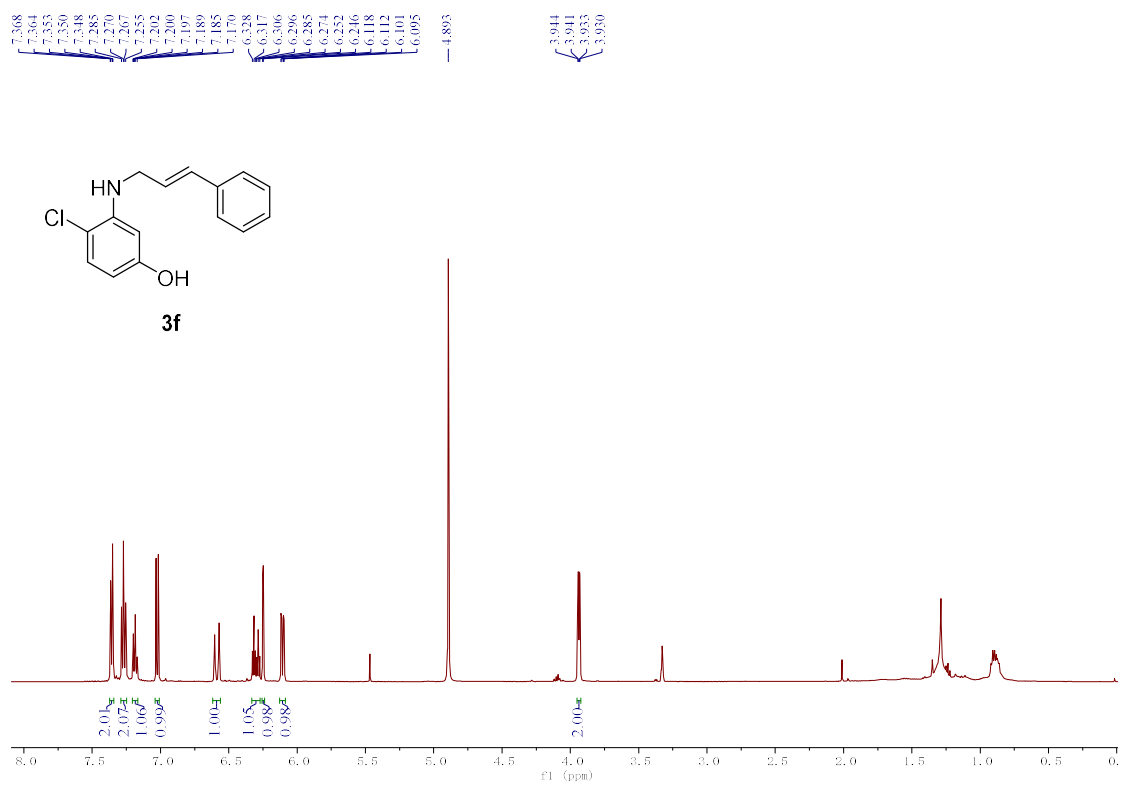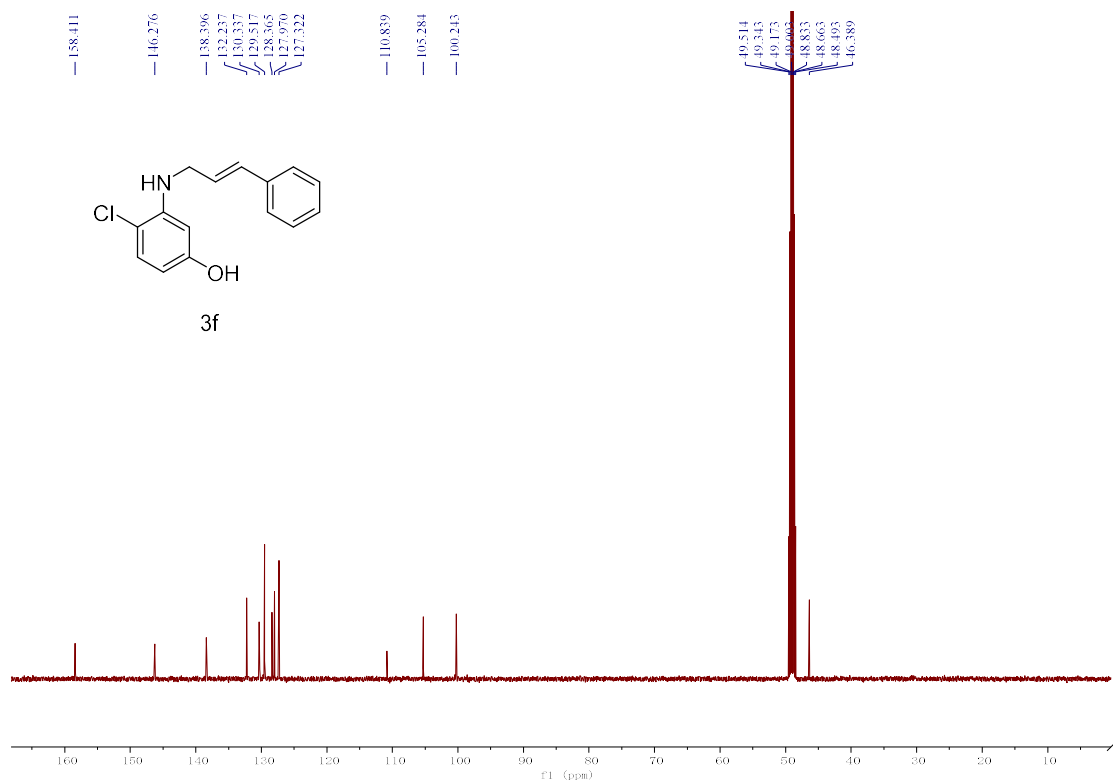

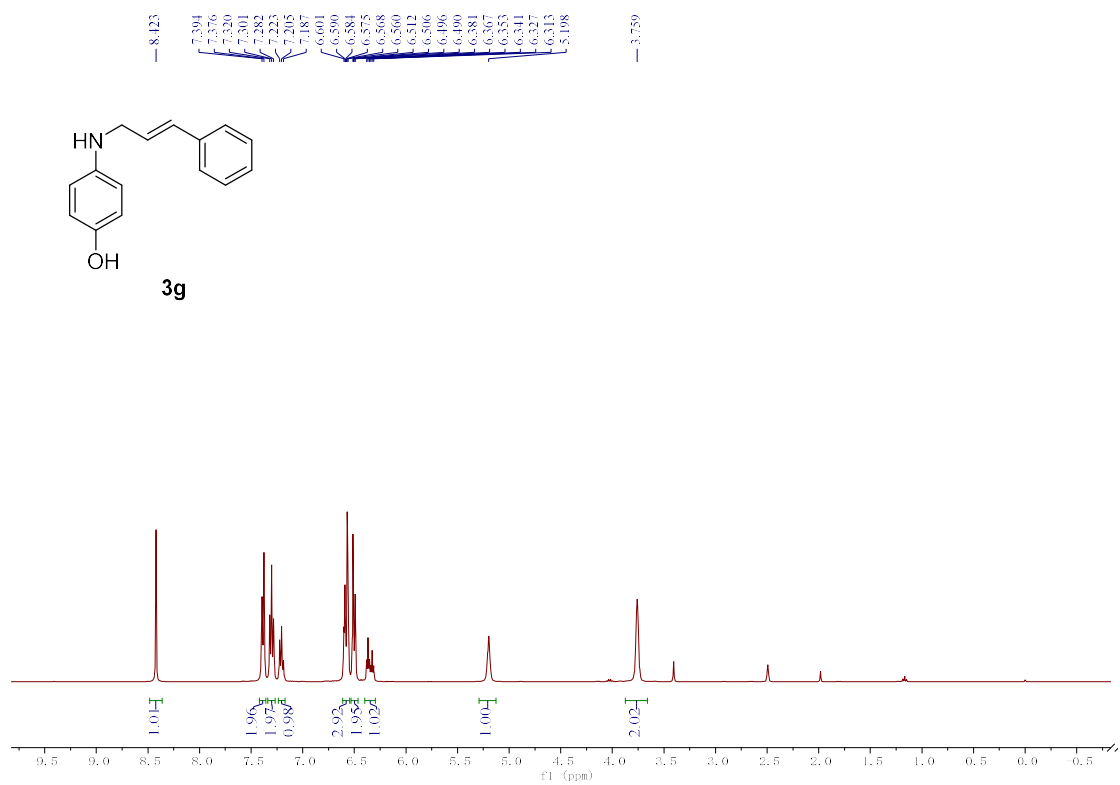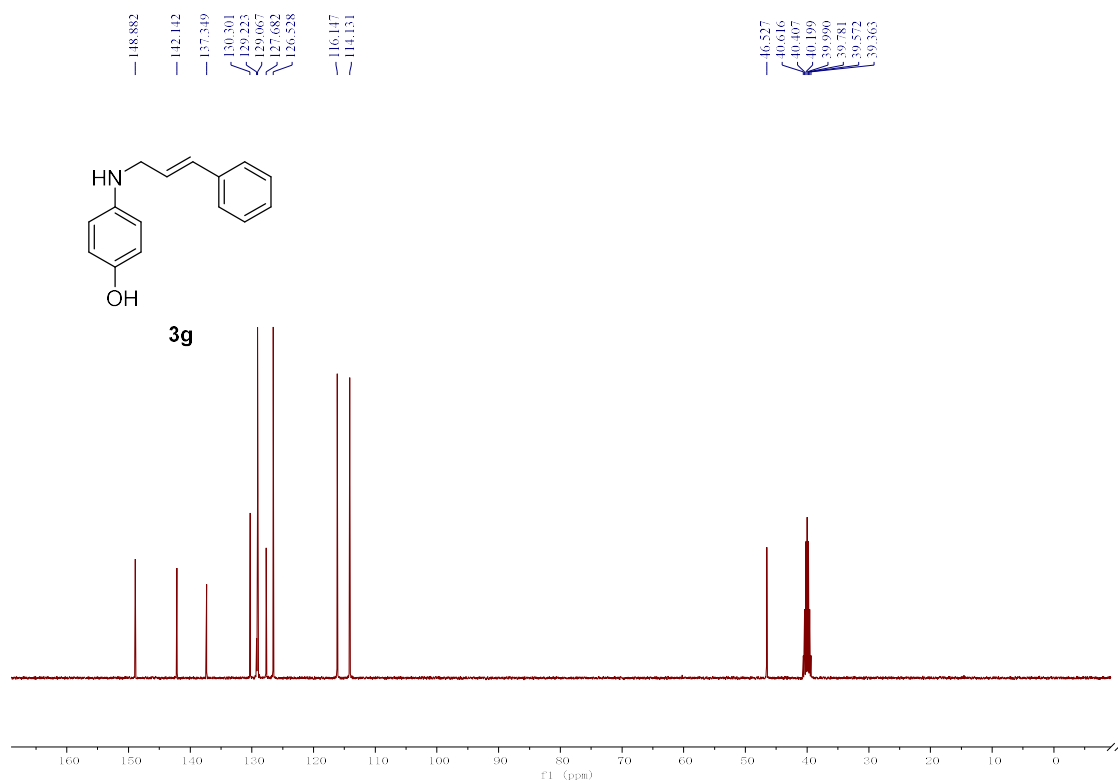



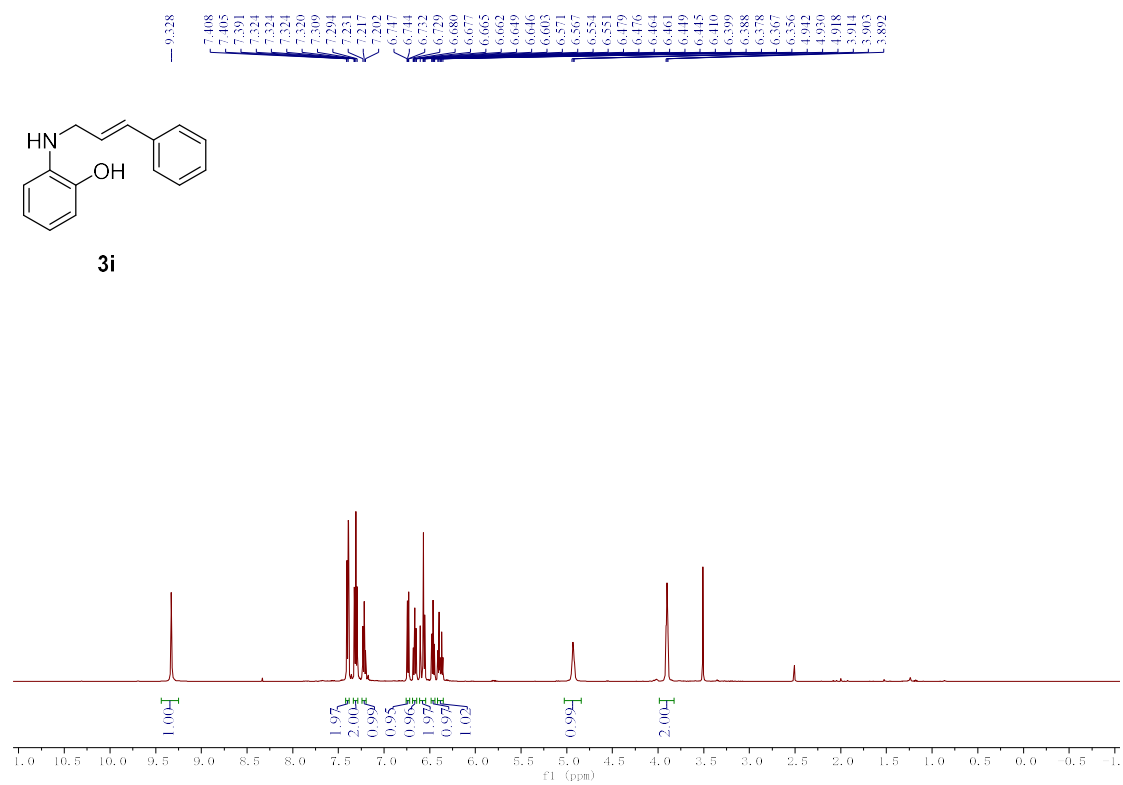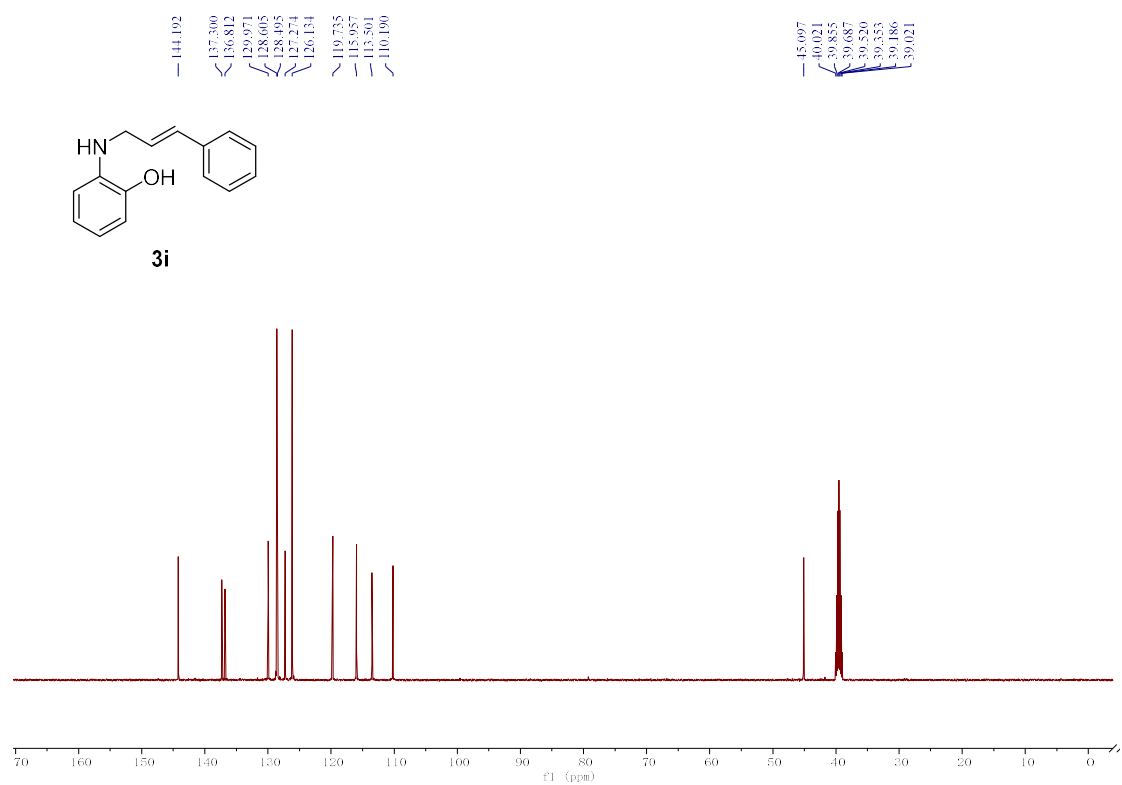

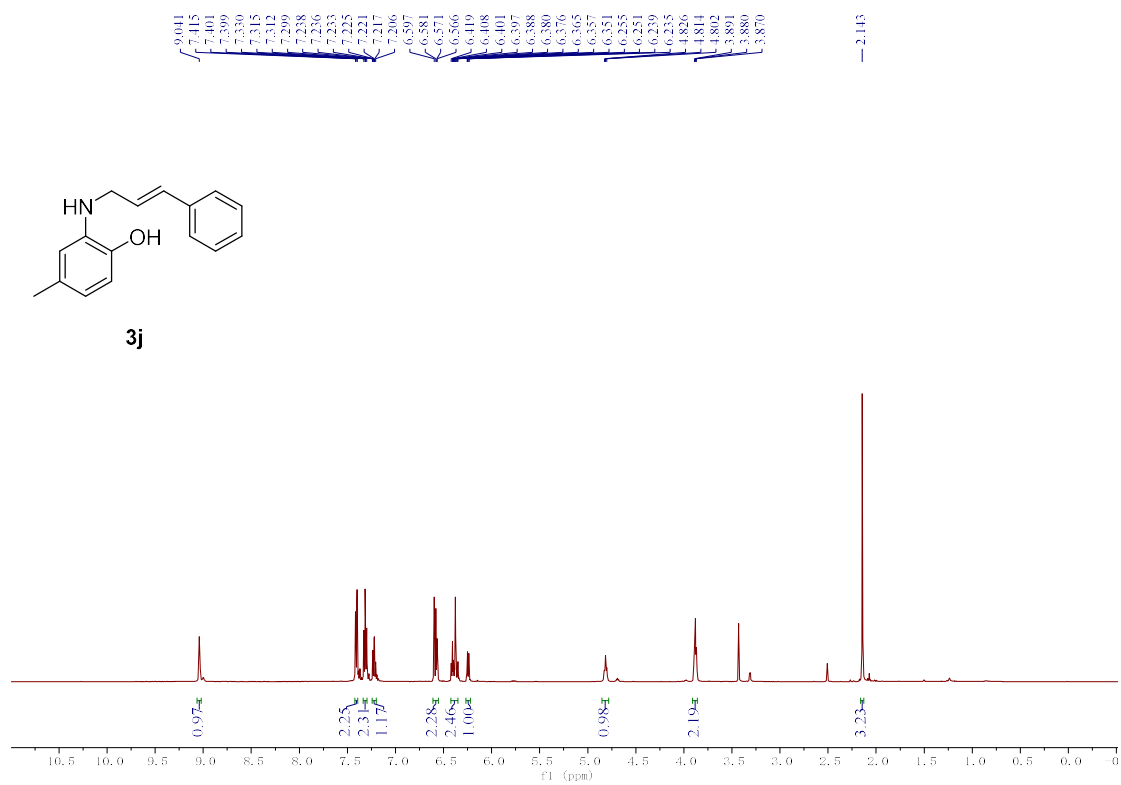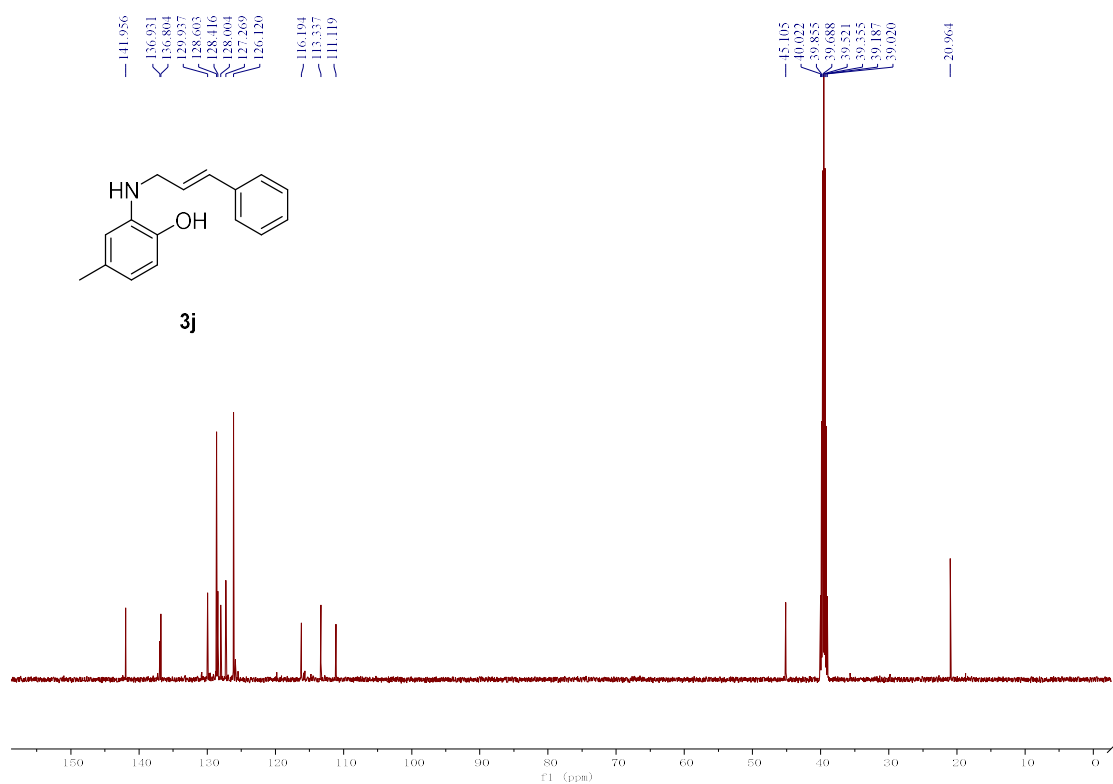

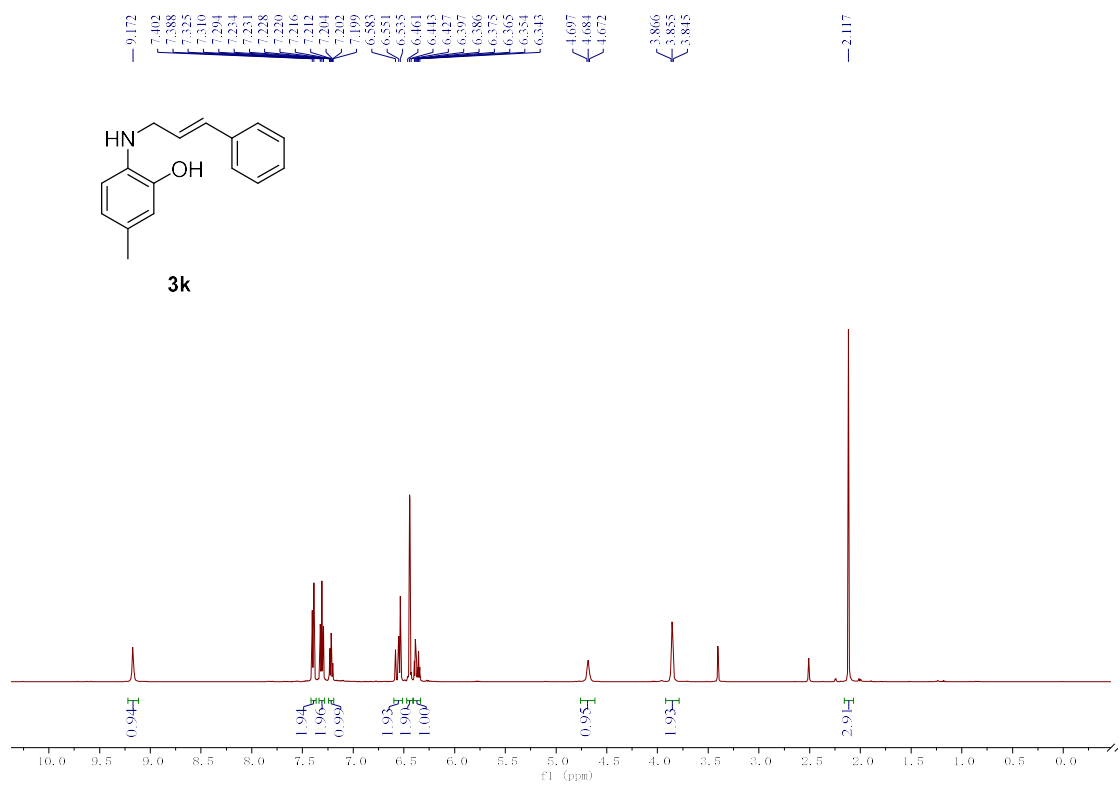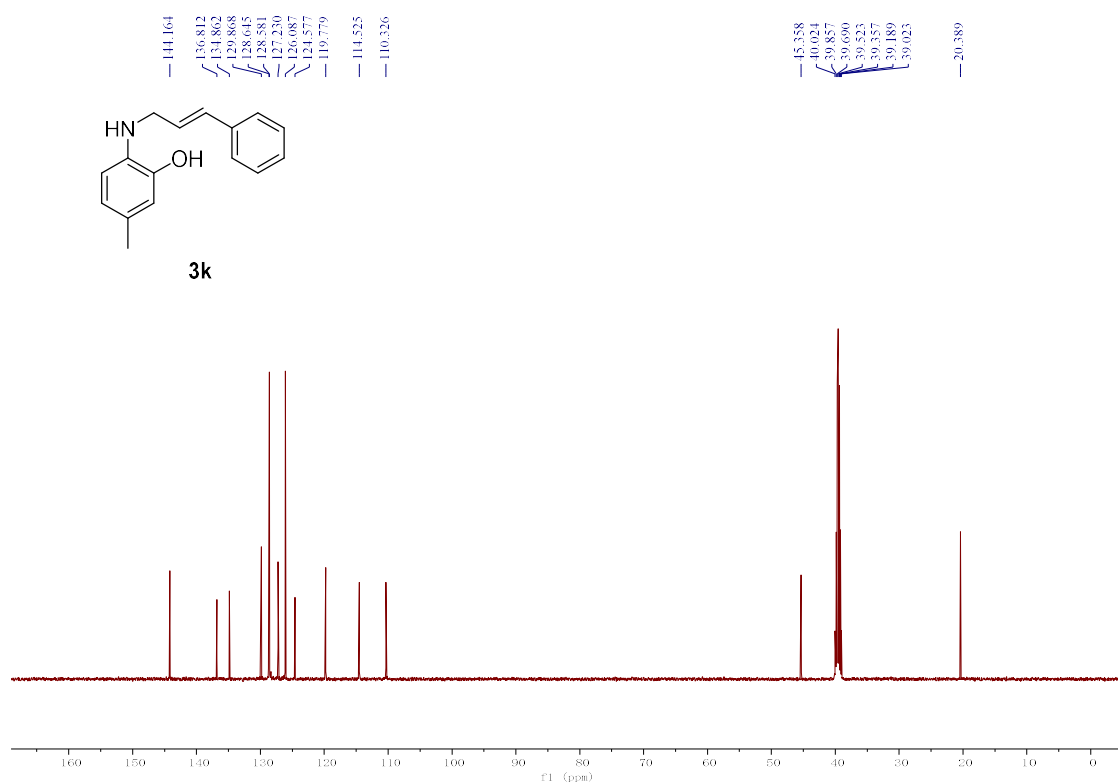

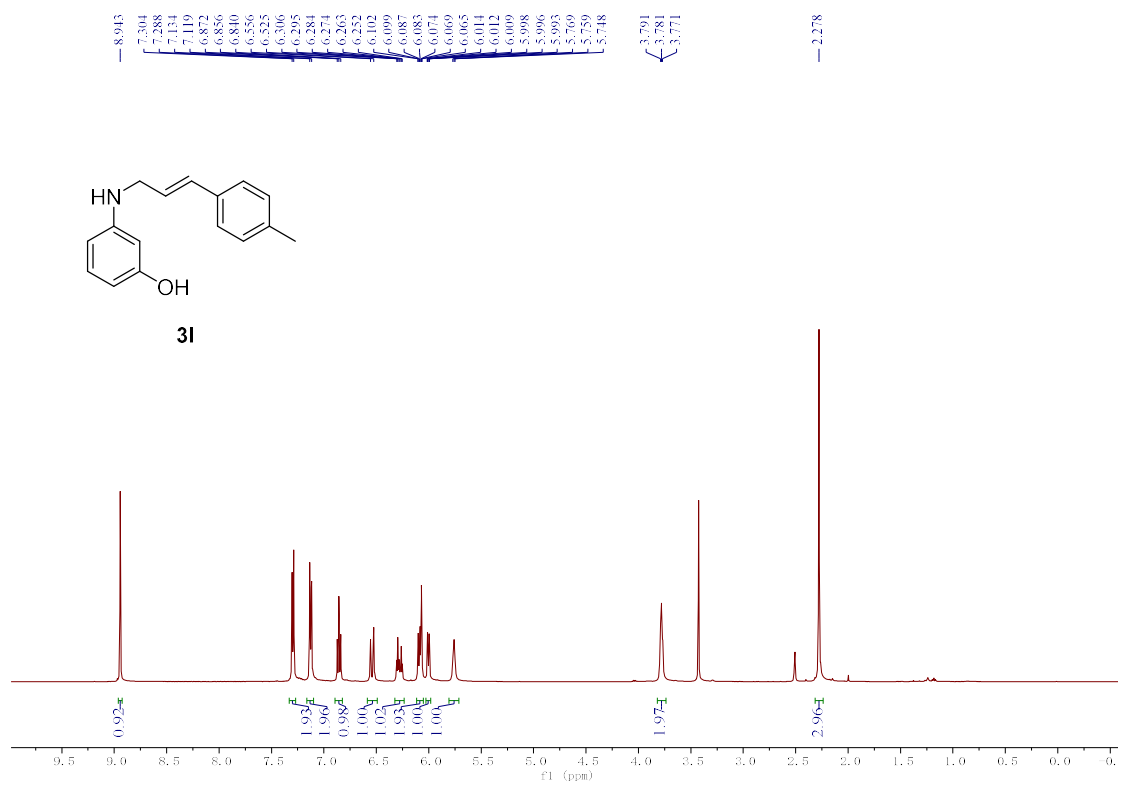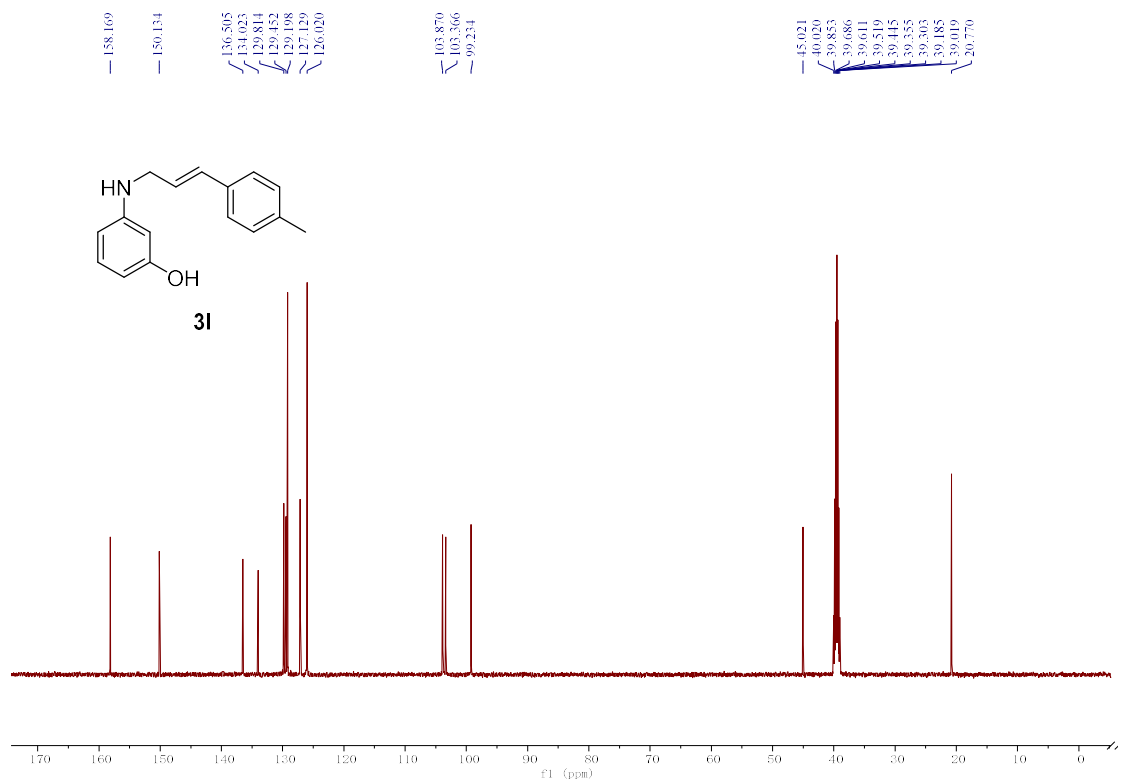



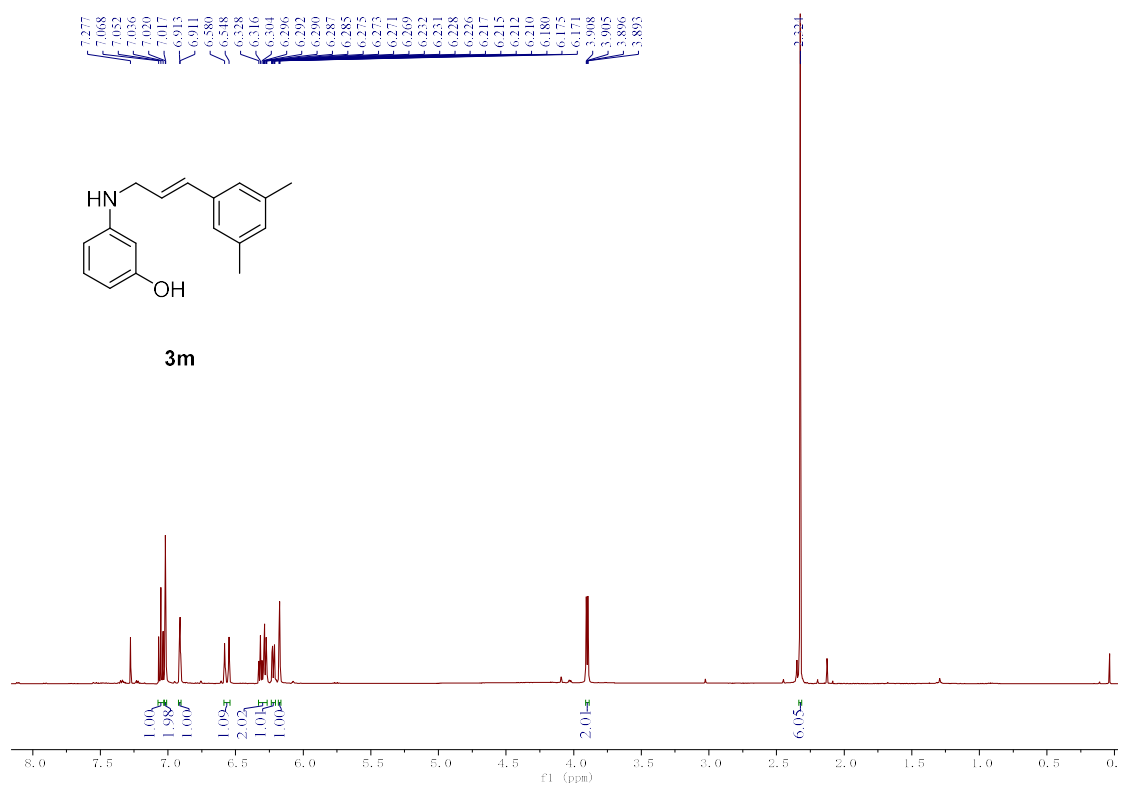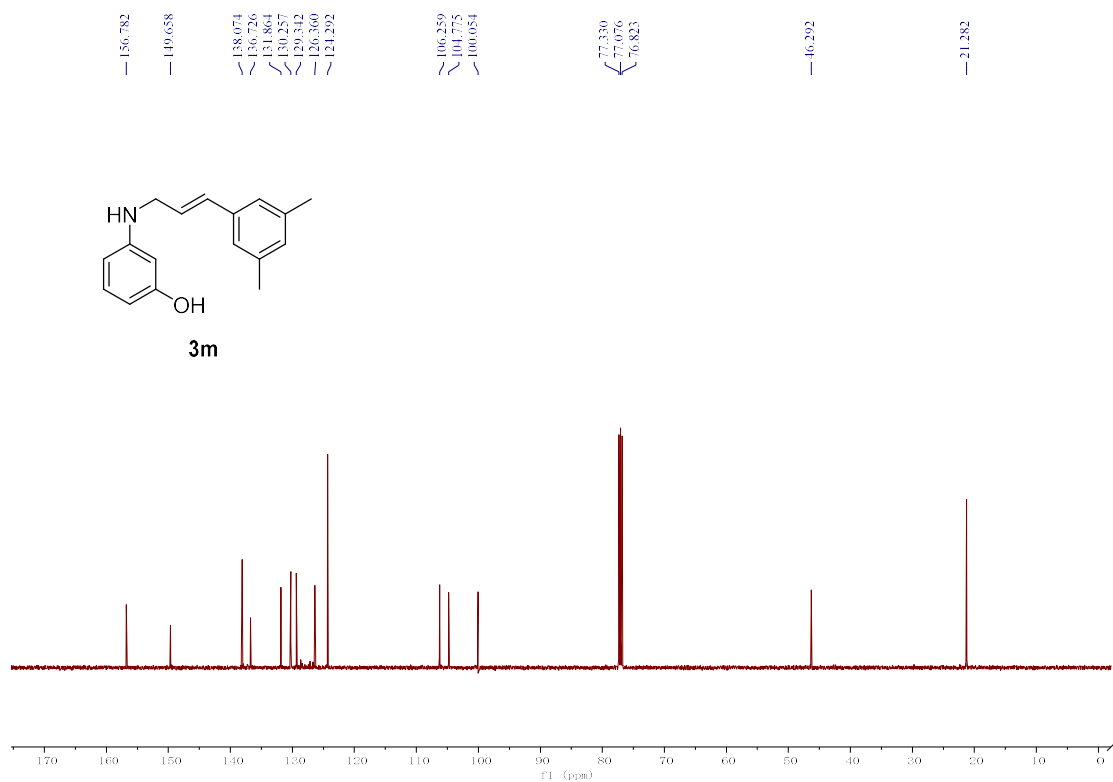

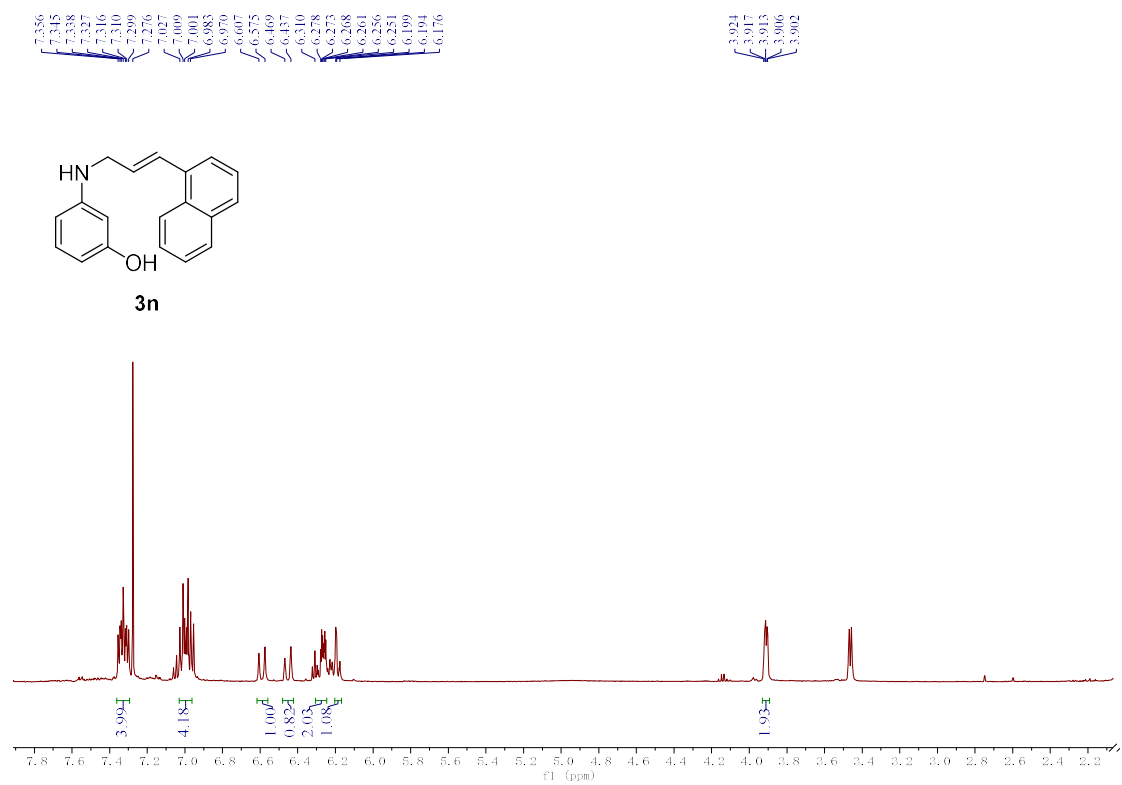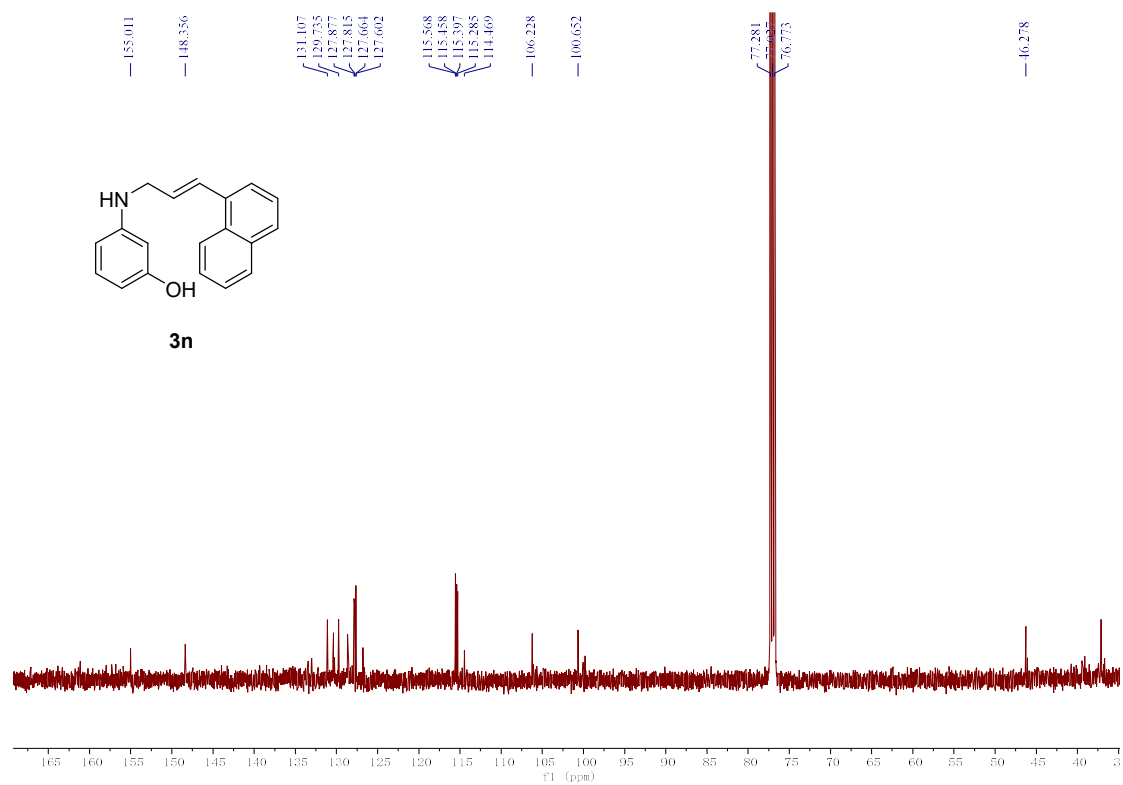

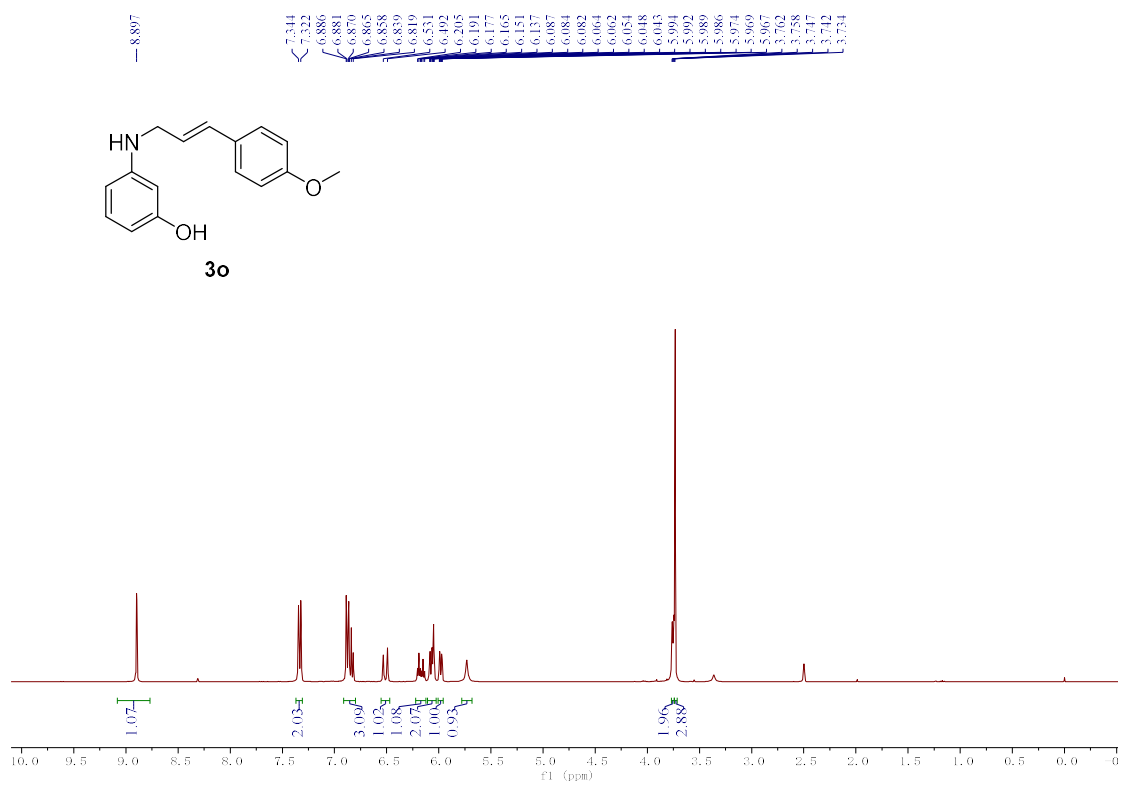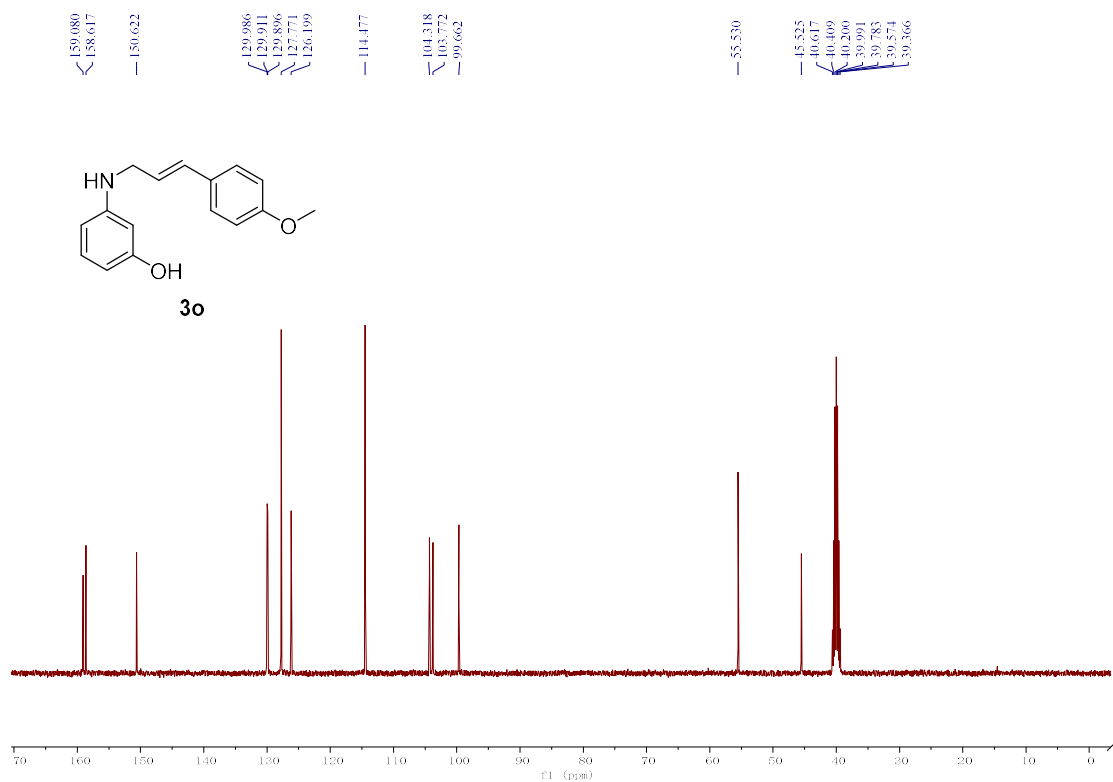

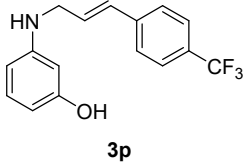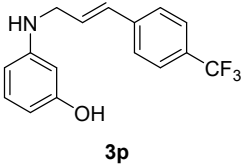

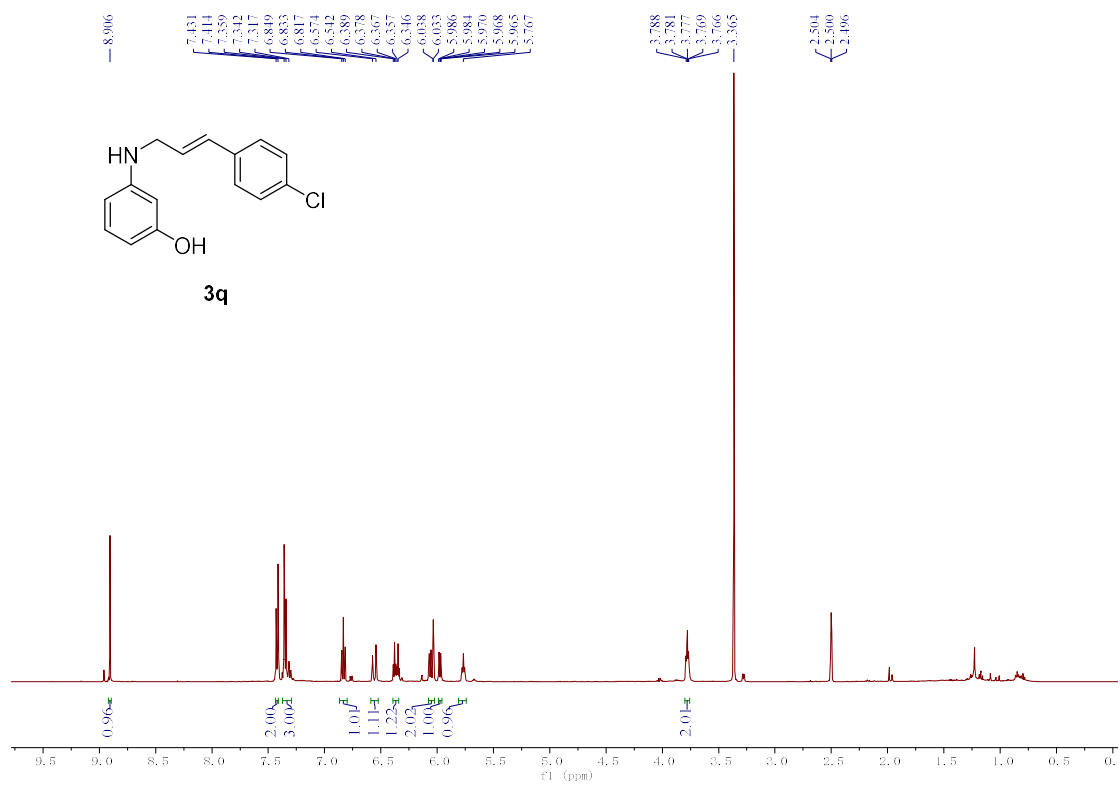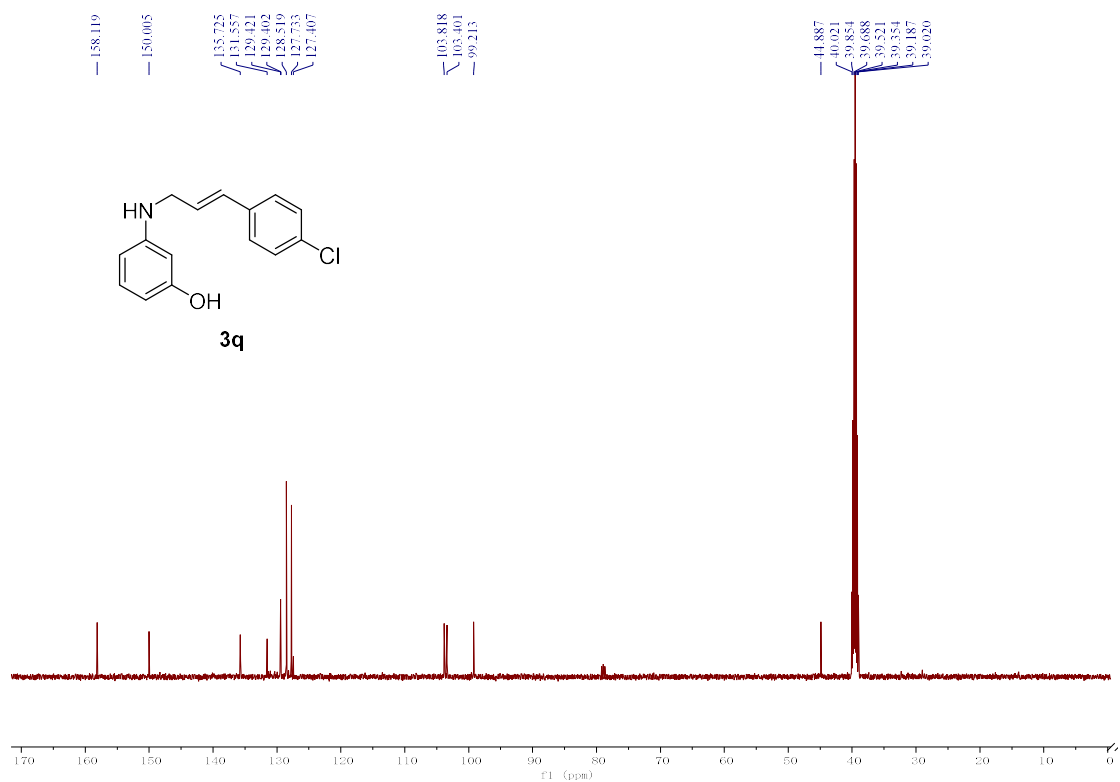

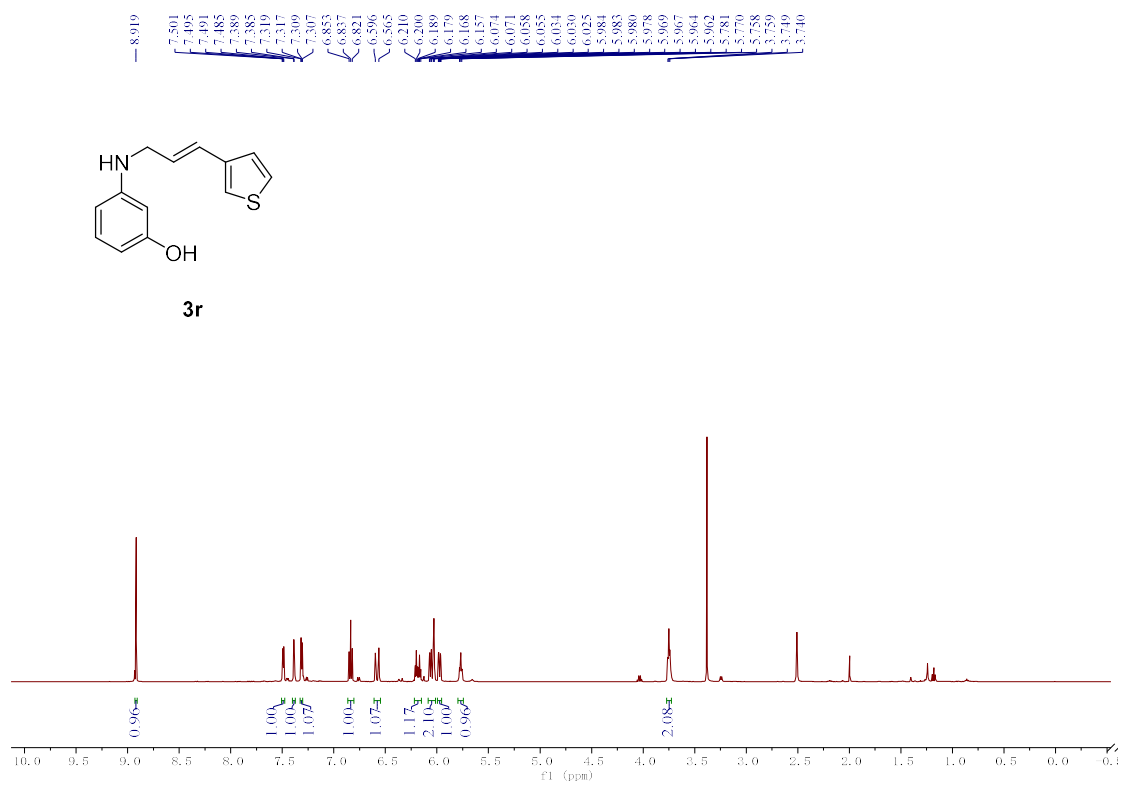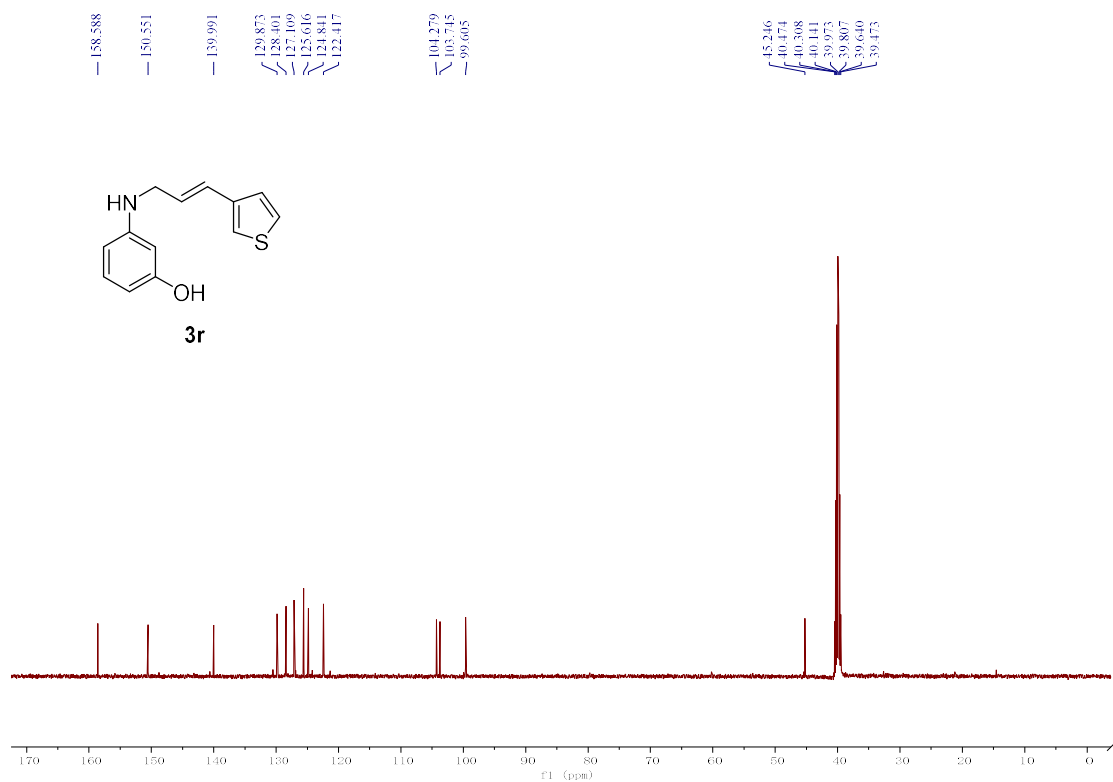

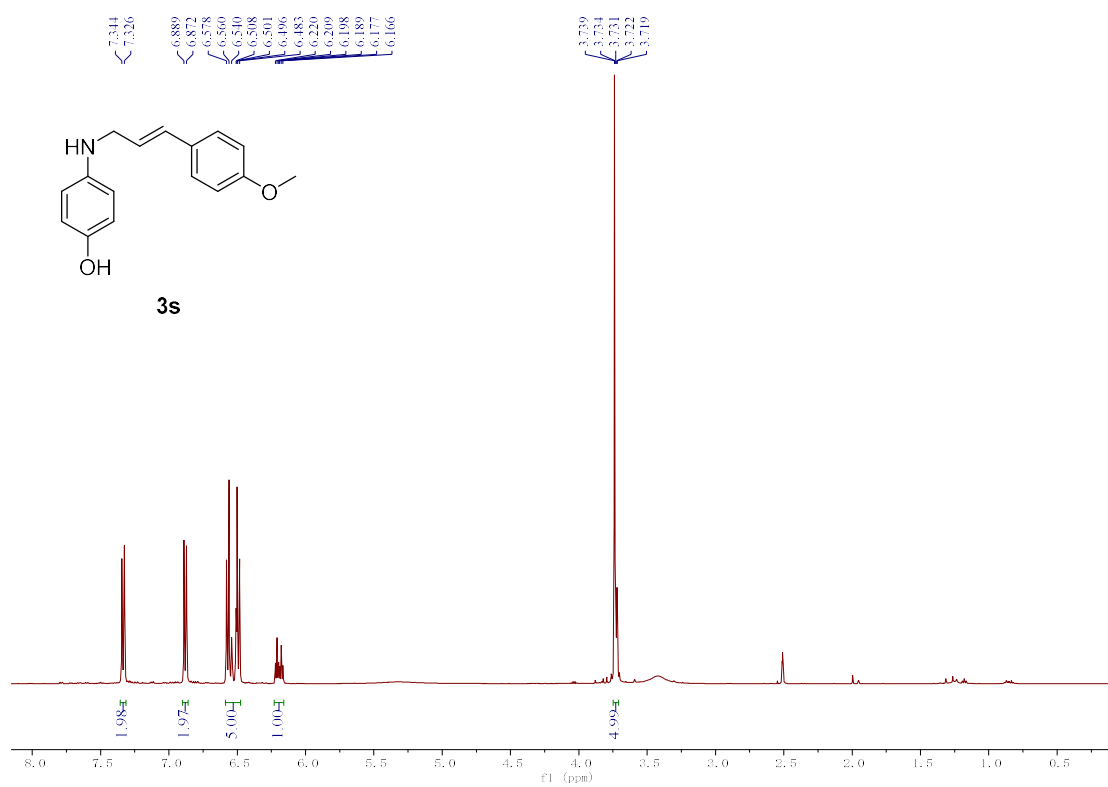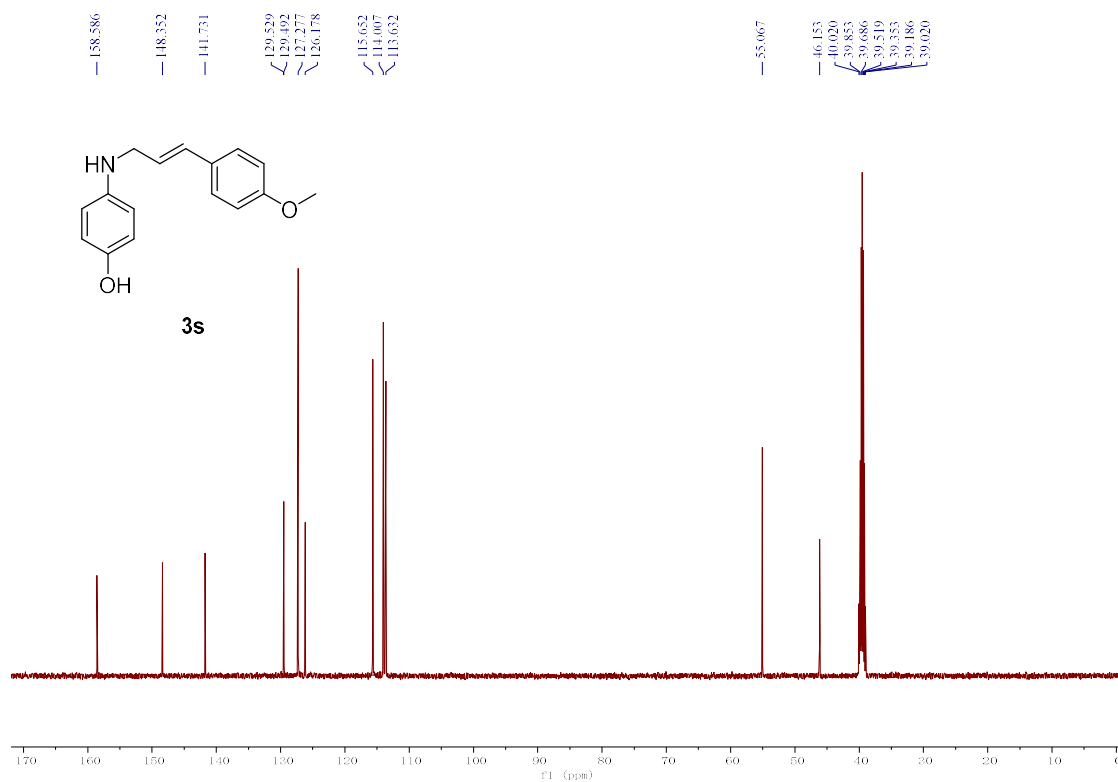

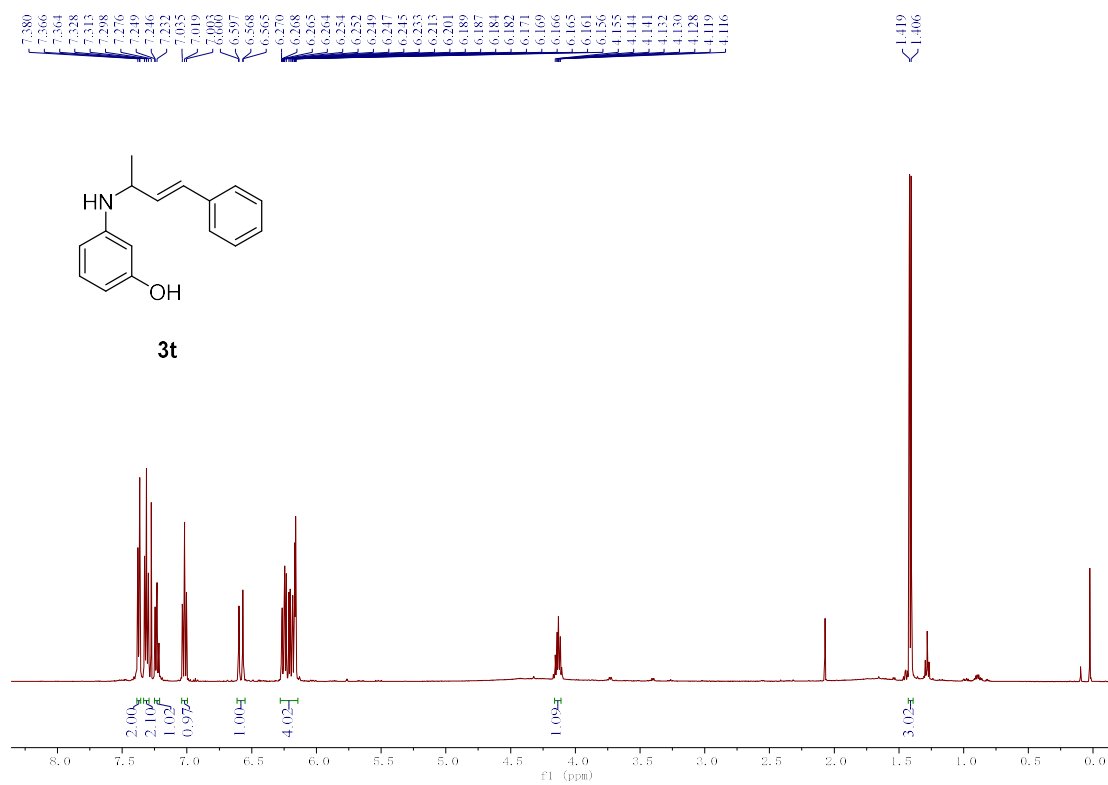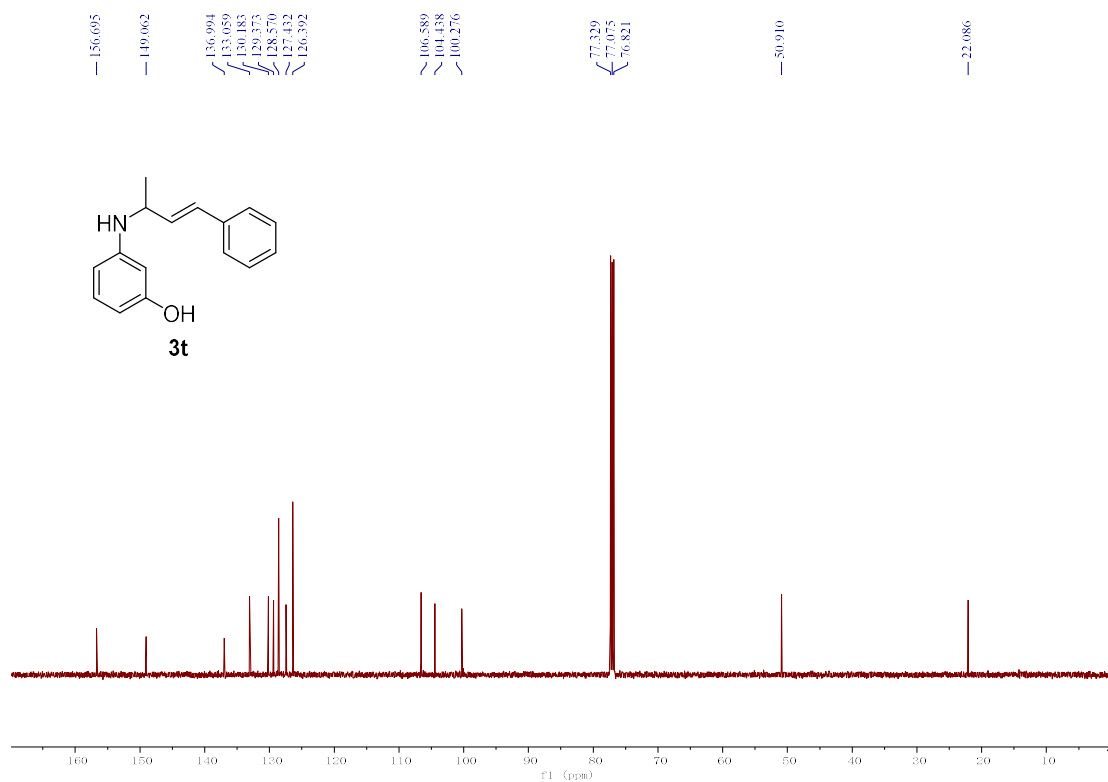



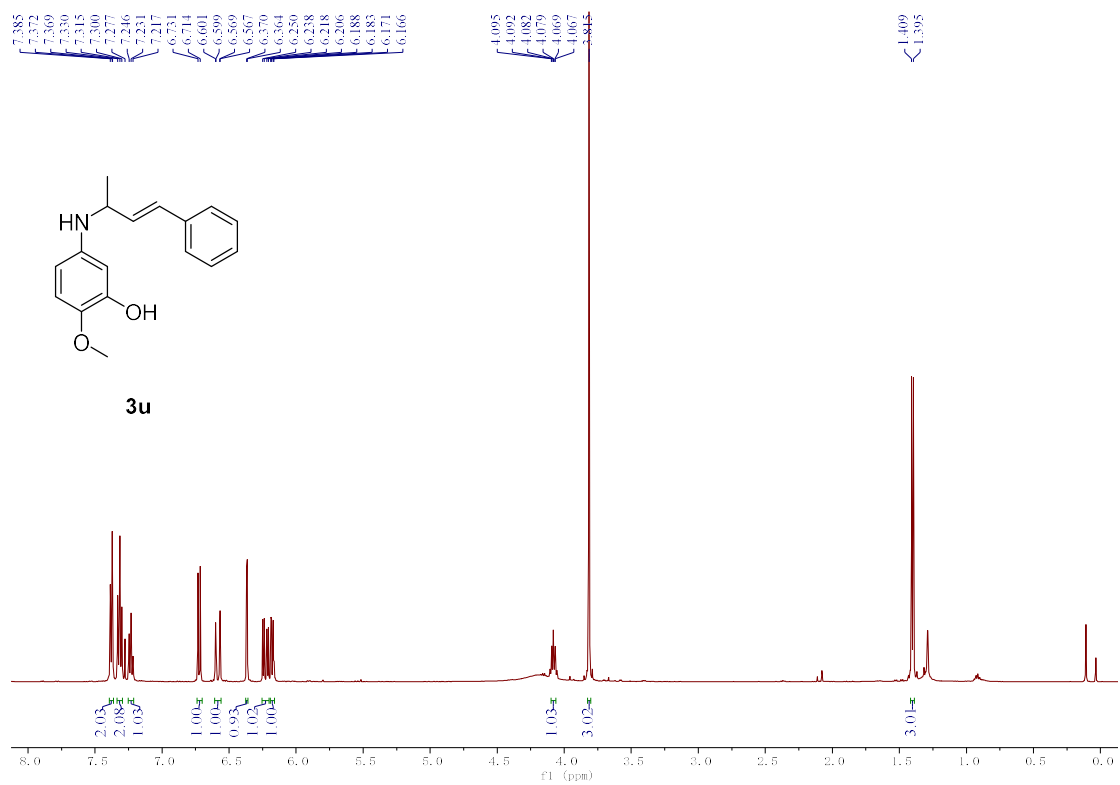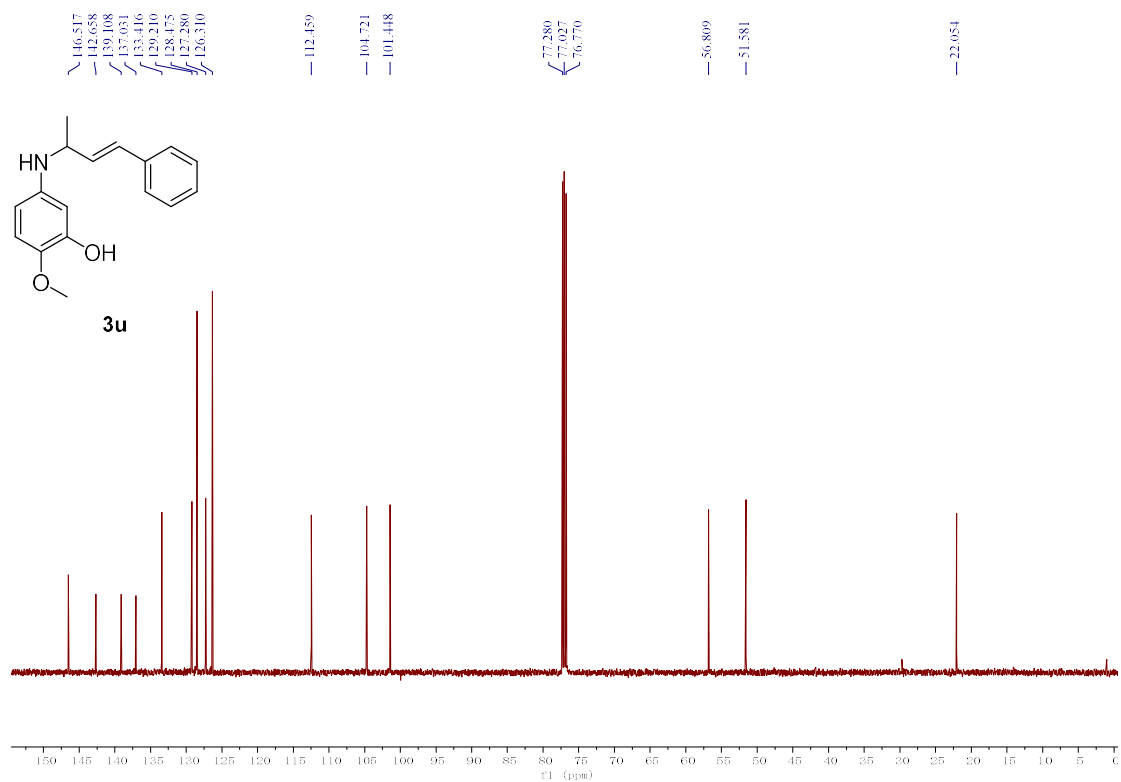

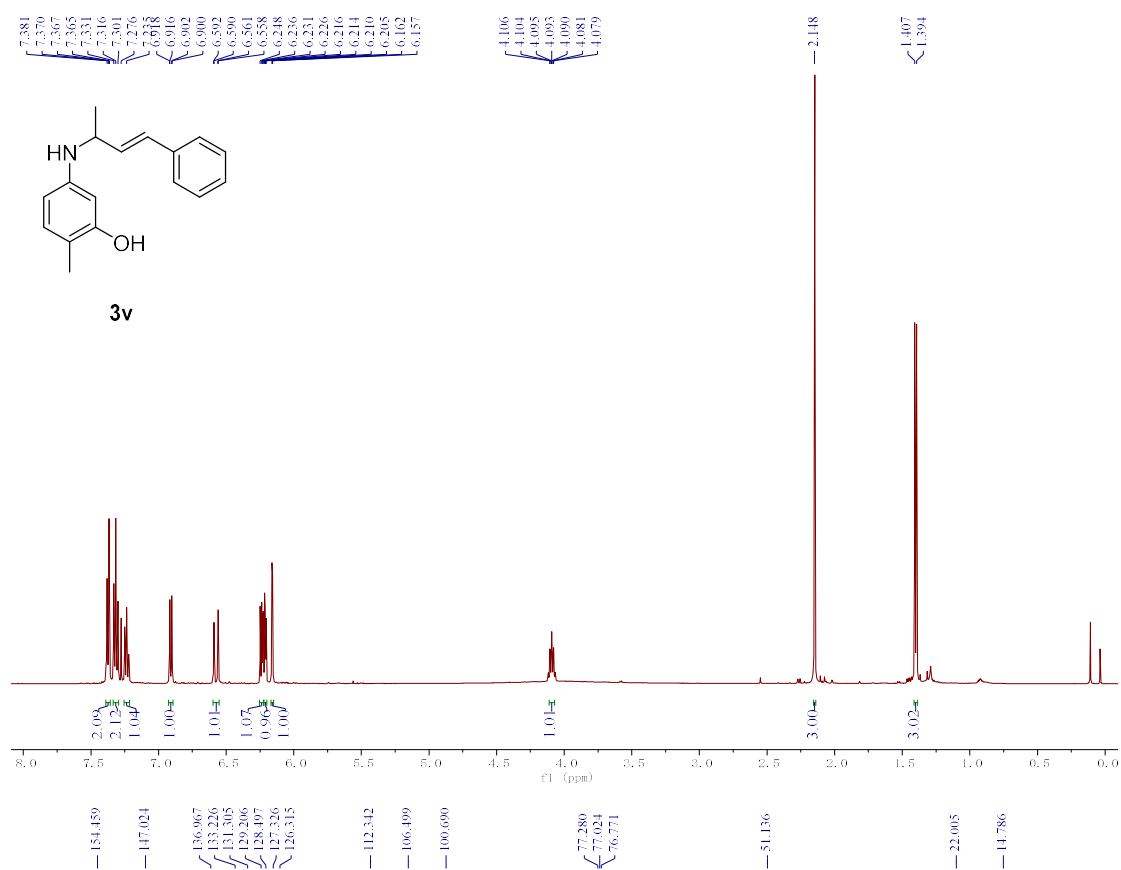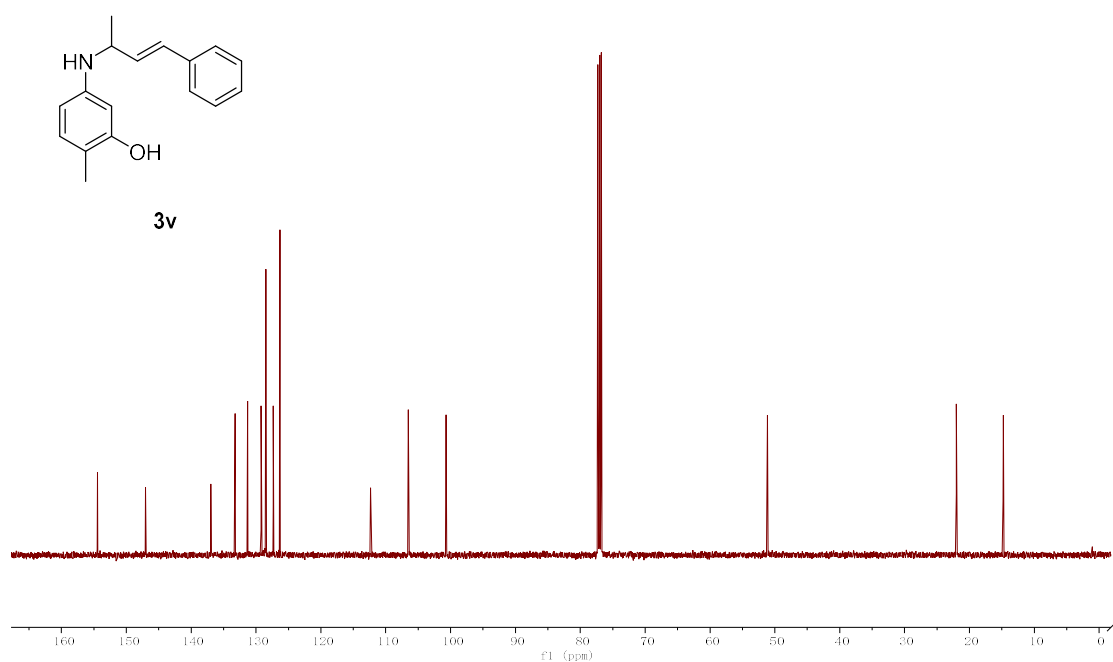

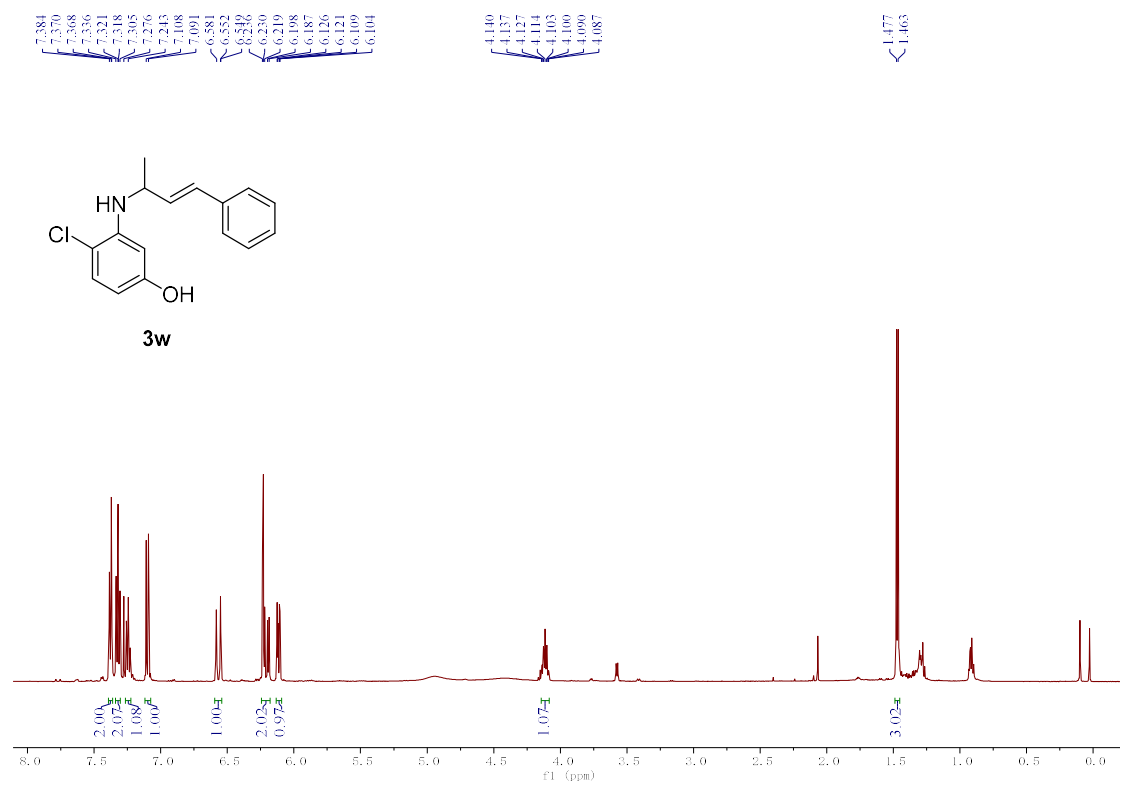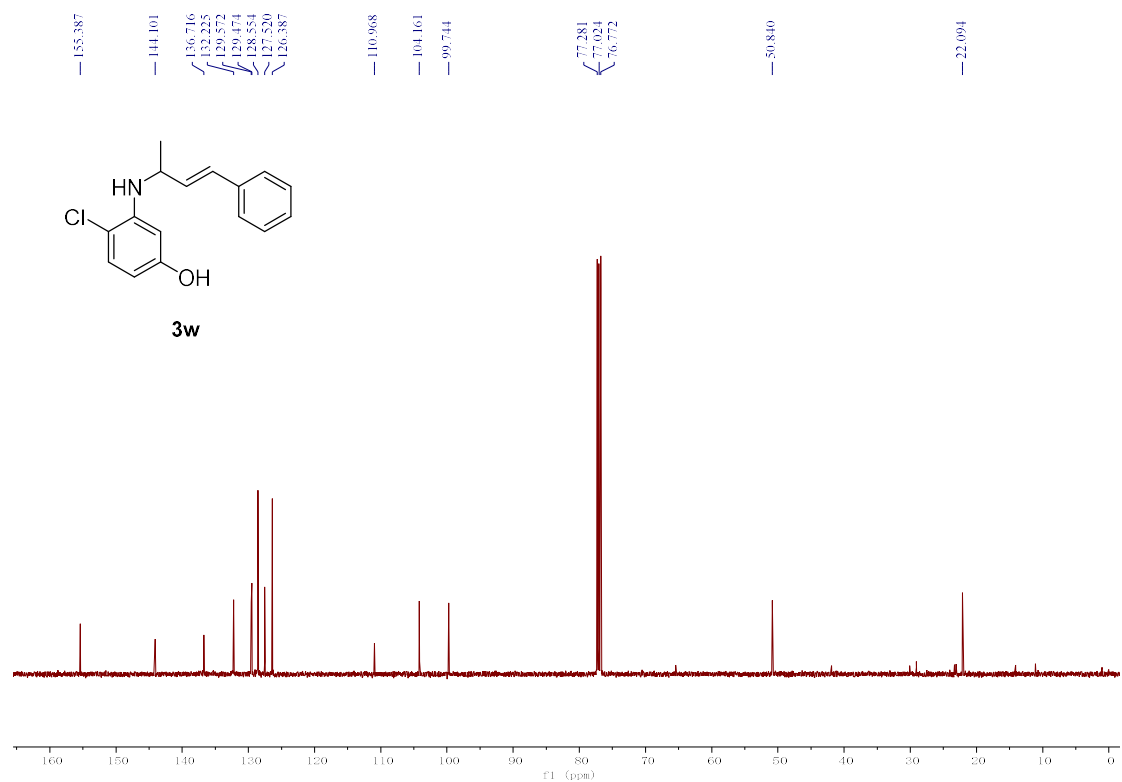

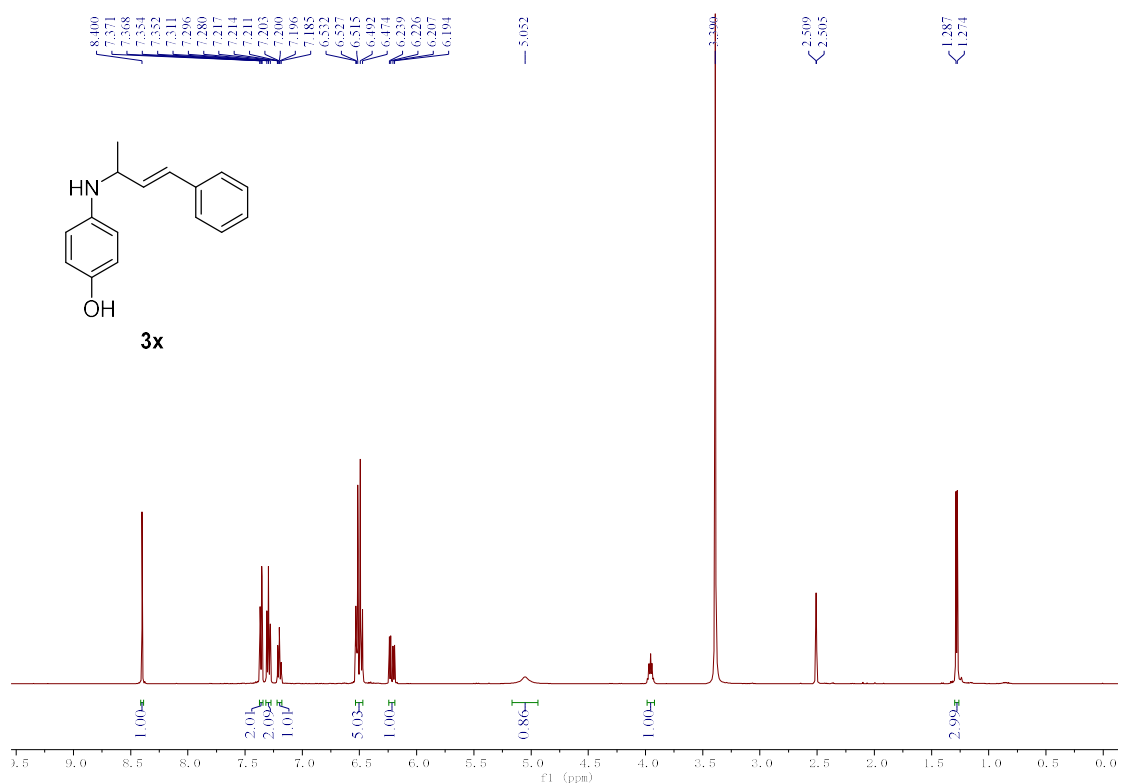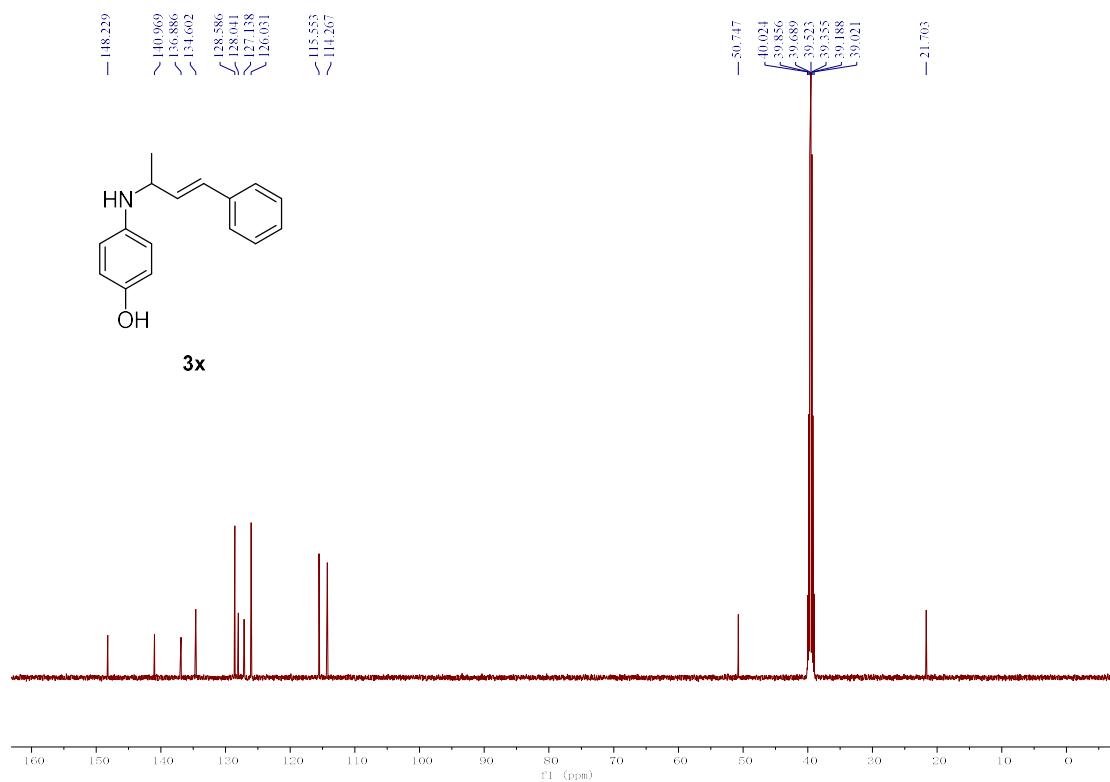

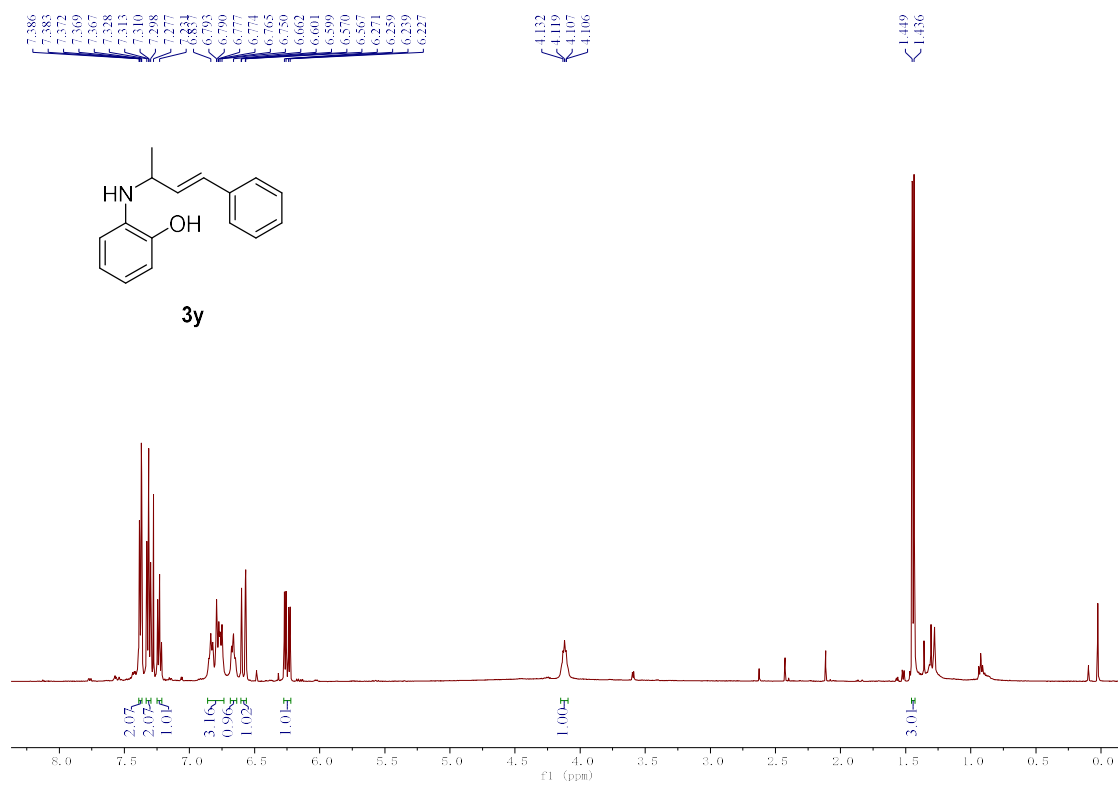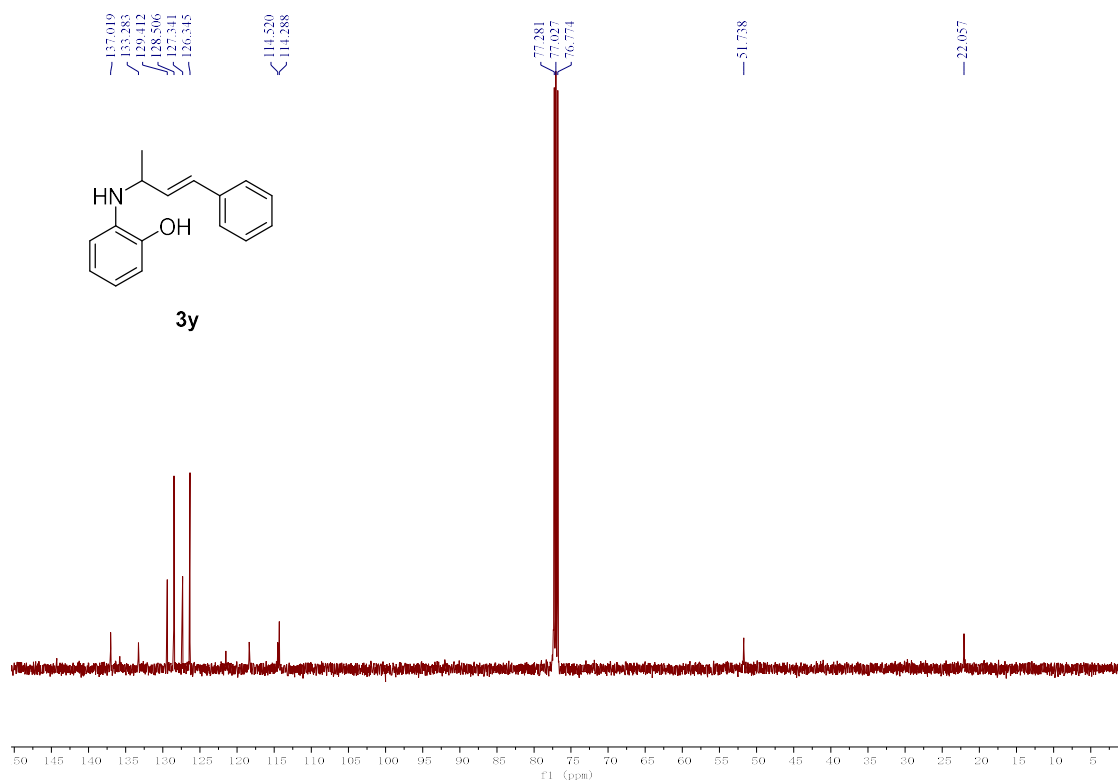

Supplement: c9ob00333a1.pdf [file c9ob00333a1.pdf]
